# Supplementary material
Source: publisher figshare collection journal article supplement (https://acs.figshare.com/ndownloader/files/4390123)
Supplement: Supplementary file 1 [file 4390123]

 
data_mr325n
 
_audit_creation_method            SHELXL-97
_chemical_name_systematic
;
 ?
;
_chemical_name_common             ?
_chemical_melting_point           ?
_chemical_formula_moiety          
 '3(C16 H36 N +), (C34 H41 Mn Mo6 N O24 3-)'
_chemical_formula_sum
 'C82 H149 Mn Mo6 N4 O24'
_chemical_formula_weight          2205.63
 
loop_
 _atom_type_symbol
 _atom_type_description
 _atom_type_scat_dispersion_real
 _atom_type_scat_dispersion_imag
 _atom_type_scat_source
 'Mo'  'Mo'  -0.0483   2.7339
 'International Tables Vol C Tables 4.2.6.8 and 6.1.1.4'
 'Mn'  'Mn'  -0.5299   2.8052
 'International Tables Vol C Tables 4.2.6.8 and 6.1.1.4'
 'O'  'O'   0.0492   0.0322
 'International Tables Vol C Tables 4.2.6.8 and 6.1.1.4'
 'N'  'N'   0.0311   0.0180
 'International Tables Vol C Tables 4.2.6.8 and 6.1.1.4'
 'C'  'C'   0.0181   0.0091
 'International Tables Vol C Tables 4.2.6.8 and 6.1.1.4'
 'H'  'H'   0.0000   0.0000
 'International Tables Vol C Tables 4.2.6.8 and 6.1.1.4'
 
_symmetry_cell_setting            monoclinic
_symmetry_space_group_name_H-M    P2(1)/c
 
loop_
 _symmetry_equiv_pos_as_xyz
 'x, y, z'
 '-x, y+1/2, -z+1/2'
 '-x, -y, -z'
 'x, -y-1/2, z-1/2'
 
_cell_length_a                    24.6269(2)
_cell_length_b                    14.3093(2)
_cell_length_c                    26.7863(2)
_cell_angle_alpha                 90.00
_cell_angle_beta                  91.5980(10)
_cell_angle_gamma                 90.00
_cell_volume                      9435.65(17)
_cell_formula_units_Z             4
_cell_measurement_temperature     150(2)
_cell_measurement_reflns_used     14584
_cell_measurement_theta_min       3.5
_cell_measurement_theta_max       62.5
 
_exptl_crystal_description        block
_exptl_crystal_colour             orange
_exptl_crystal_size_max           0.18
_exptl_crystal_size_mid           0.13
_exptl_crystal_size_min           0.06
_exptl_crystal_density_meas       none
_exptl_crystal_density_diffrn     1.553
_exptl_crystal_density_method     'not measured'
_exptl_crystal_F_000              4552
_exptl_absorpt_coefficient_mu     7.955
_exptl_absorpt_correction_type    'analytical'
_exptl_absorpt_correction_T_min   0.397
_exptl_absorpt_correction_T_max   0.672
_exptl_absorpt_process_details    
;
CrysAlis RED, Oxford Diffraction Ltd.,
Version 1.171.32.29 (release 10-06-2008 CrysAlis171 .NET)
(compiled Jun 10 2008,16:49:55)
Analytical numeric absorption correction using a multifaceted crystal
			model based on expressions derived by R.C. Clark & J.S. Reid.
(Clark, R. C. & Reid, J. S. (1995). Acta Cryst. A51, 887-897)
;

_exptl_special_details
;
 ?
;
 
_diffrn_ambient_temperature       150(2)
_diffrn_radiation_wavelength      1.54184
_diffrn_radiation_type            CuK\a
_diffrn_radiation_source          'fine-focus sealed tube'
_diffrn_radiation_monochromator   graphite
_diffrn_measurement_device_type   'Oxford Diffraction Gemini CCD'
_diffrn_measurement_method        '\w & \p scans'
_diffrn_detector_area_resol_mean  ?
_diffrn_standards_number          ?
_diffrn_standards_interval_count  ?
_diffrn_standards_interval_time   ?
_diffrn_standards_decay_%         none
_diffrn_reflns_number             35651
_diffrn_reflns_av_R_equivalents   0.0294
_diffrn_reflns_av_sigmaI/netI     0.0417
_diffrn_reflns_limit_h_min        -24
_diffrn_reflns_limit_h_max        24
_diffrn_reflns_limit_k_min        -10
_diffrn_reflns_limit_k_max        14
_diffrn_reflns_limit_l_min        -25
_diffrn_reflns_limit_l_max        26
_diffrn_reflns_theta_min          3.50
_diffrn_reflns_theta_max          50.00
_reflns_number_total              9576
_reflns_number_gt                 6201
_reflns_threshold_expression      >2\s(I)
 
_computing_data_collection
;
CrysAlis CCD, Oxford Diffraction Ltd.,
Version 1.171.32.29 (release 10-06-2008 CrysAlis171 .NET)
(compiled Jun 10 2008,16:49:55)
;
_computing_cell_refinement
;
CrysAlis RED, Oxford Diffraction Ltd.,
Version 1.171.32.29 (release 10-06-2008 CrysAlis171 .NET)
(compiled Jun 10 2008,16:49:55)
;
_computing_data_reduction
;
CrysAlis RED, Oxford Diffraction Ltd.,
Version 1.171.32.29 (release 10-06-2008 CrysAlis171 .NET)
(compiled Jun 10 2008,16:49:55)
;
_computing_structure_solution     'SHELXS-97 (Sheldrick, 2008)'
_computing_structure_refinement   'SHELXL-97 (Sheldrick, 2008)'
_computing_molecular_graphics     ?
_computing_publication_material   ?
 
_refine_special_details
;
 Refinement of F^2^ against ALL reflections.  The weighted R-factor wR and
 goodness of fit S are based on F^2^, conventional R-factors R are based
 on F, with F set to zero for negative F^2^. The threshold expression of
 F^2^ > 2\s(F^2^) is used only for calculating R-factors(gt) etc. and is
 not relevant to the choice of reflections for refinement.  R-factors based
 on F^2^ are statistically about twice as large as those based on F, and R-
 factors based on ALL data will be even larger.
;
 
_refine_ls_structure_factor_coef  Fsqd
_refine_ls_matrix_type            full
_refine_ls_weighting_scheme       calc
_refine_ls_weighting_details
 'calc w=1/[\s^2^(Fo^2^)+(0.1814P)^2^+0.0000P] where P=(Fo^2^+2Fc^2^)/3'
_atom_sites_solution_primary      direct
_atom_sites_solution_secondary    difmap
_atom_sites_solution_hydrogens    geom
_refine_ls_hydrogen_treatment     riding
_refine_ls_extinction_method      none
_refine_ls_extinction_coef        none
_refine_ls_number_reflns          9576
_refine_ls_number_parameters      746
_refine_ls_number_restraints      61
_refine_ls_R_factor_all           0.1011
_refine_ls_R_factor_gt            0.0766
_refine_ls_wR_factor_ref          0.2630
_refine_ls_wR_factor_gt           0.2470
_refine_ls_goodness_of_fit_ref    1.063
_refine_ls_restrained_S_all       1.063
_refine_ls_shift/su_max           0.003
_refine_ls_shift/su_mean          0.000
 
loop_
 _atom_site_label
 _atom_site_type_symbol
 _atom_site_fract_x
 _atom_site_fract_y
 _atom_site_fract_z
 _atom_site_U_iso_or_equiv
 _atom_site_adp_type
 _atom_site_occupancy
 _atom_site_symmetry_multiplicity
 _atom_site_calc_flag
 _atom_site_refinement_flags
 _atom_site_disorder_assembly
 _atom_site_disorder_group
Mo1 Mo 0.69760(3) 0.49465(5) 0.82615(2) 0.0746(2) Uani 1 1 d . . .
Mo2 Mo 0.67166(2) 0.77249(5) 0.66802(2) 0.0660(2) Uani 1 1 d . . .
Mo3 Mo 0.80346(2) 0.82885(5) 0.68075(2) 0.0664(2) Uani 1 1 d . . .
Mo4 Mo 0.88250(2) 0.71688(5) 0.76537(2) 0.0652(2) Uani 1 1 d . . .
Mo5 Mo 0.61860(2) 0.60725(5) 0.74166(2) 0.0634(2) Uani 1 1 d . . .
Mo6 Mo 0.82950(2) 0.54965(5) 0.83689(2) 0.0719(2) Uani 1 1 d . . .
Mn1 Mn 0.75050(4) 0.66207(7) 0.75327(3) 0.0488(3) Uani 1 1 d . . .
O1 O 0.70161(16) 0.6257(3) 0.69918(15) 0.0540(13) Uani 1 1 d . . .
O2 O 0.81468(16) 0.6737(3) 0.70741(15) 0.0589(14) Uani 1 1 d . . .
O3 O 0.76772(17) 0.5312(3) 0.77071(15) 0.0605(14) Uani 1 1 d . . .
O4 O 0.73306(17) 0.7938(3) 0.73514(16) 0.0639(15) Uani 1 1 d . . .
O5 O 0.79875(17) 0.6976(3) 0.80691(15) 0.0565(14) Uani 1 1 d . . .
O6 O 0.68694(16) 0.6496(3) 0.79924(16) 0.0596(14) Uani 1 1 d . . .
O7 O 0.75790(18) 0.5503(4) 0.86293(16) 0.0770(17) Uani 1 1 d . . .
O8 O 0.65481(18) 0.4949(3) 0.76482(17) 0.0691(16) Uani 1 1 d . . .
O9 O 0.87433(17) 0.5896(4) 0.78320(16) 0.0683(16) Uani 1 1 d . . .
O10 O 0.84589(17) 0.8282(3) 0.74251(17) 0.0701(16) Uani 1 1 d . . .
O11 O 0.74426(17) 0.7737(3) 0.64276(15) 0.0652(15) Uani 1 1 d . . .
O12 O 0.62705(17) 0.7362(3) 0.72213(16) 0.0663(15) Uani 1 1 d . . .
O13 O 0.6552(2) 0.8869(4) 0.66501(19) 0.090(2) Uani 1 1 d . . .
O14 O 0.6493(2) 0.5027(4) 0.87094(18) 0.099(2) Uani 1 1 d . . .
O15 O 0.7150(3) 0.3804(4) 0.8253(2) 0.105(2) Uani 1 1 d . . .
O16 O 0.8451(2) 0.4349(4) 0.83814(18) 0.0901(19) Uani 1 1 d . . .
O17 O 0.8625(2) 0.5964(4) 0.88708(17) 0.0876(19) Uani 1 1 d . . .
O18 O 0.85199(19) 0.8197(4) 0.63641(17) 0.0851(18) Uani 1 1 d . . .
O19 O 0.63869(19) 0.7227(4) 0.61935(17) 0.0807(18) Uani 1 1 d . . .
O20 O 0.56739(18) 0.6191(4) 0.78239(18) 0.0802(18) Uani 1 1 d . . .
O21 O 0.58881(19) 0.5618(4) 0.68964(18) 0.0779(17) Uani 1 1 d . . .
O22 O 0.91163(19) 0.7596(4) 0.81764(17) 0.0790(18) Uani 1 1 d . . .
O23 O 0.93283(18) 0.7056(4) 0.72352(18) 0.0810(18) Uani 1 1 d . . .
O24 O 0.7865(2) 0.9386(4) 0.6819(2) 0.095(2) Uani 1 1 d . . .
N1 N 0.7066(3) 0.8732(5) 0.8657(3) 0.106(3) Uani 1 1 d D . .
H1A H 0.6960 0.8424 0.8930 0.127 Uiso 0.50 1 calc PR . .
H1B H 0.6773 0.9036 0.8530 0.127 Uiso 0.50 1 calc PR . .
N2 N 1.0247(3) 0.4902(5) 0.8118(2) 0.160(4) Uani 1 1 d D . .
N3 N 0.4744(2) 0.8108(5) 0.6942(3) 0.123(3) Uani 1 1 d D . .
N4 N 0.7512(3) 0.9419(5) 0.5163(2) 0.149(4) Uani 1 1 d D . .
C1 C 0.8214(3) 0.6005(5) 0.6734(2) 0.069(2) Uani 1 1 d . . .
H1C H 0.8573 0.5742 0.6788 0.083 Uiso 1 1 calc R . .
H1D H 0.8197 0.6262 0.6399 0.083 Uiso 1 1 calc R . .
C2 C 0.7207(3) 0.5552(5) 0.6641(2) 0.069(3) Uani 1 1 d . . .
H2A H 0.7203 0.5821 0.6308 0.083 Uiso 1 1 calc R . .
H2B H 0.6955 0.5031 0.6636 0.083 Uiso 1 1 calc R . .
C3 C 0.7779(3) 0.5183(6) 0.6766(3) 0.067(2) Uani 1 1 d . B .
C4 C 0.7801(3) 0.4720(6) 0.7286(3) 0.076(3) Uani 1 1 d . . .
H4A H 0.7549 0.4199 0.7281 0.091 Uiso 1 1 calc R . .
H4B H 0.8163 0.4465 0.7342 0.091 Uiso 1 1 calc R . .
C5 C 0.7902(3) 0.4425(5) 0.6393(2) 0.074(3) Uani 1 1 d D . .
H5A H 0.8244 0.4139 0.6498 0.089 Uiso 1 1 calc R A 1
H5B H 0.7624 0.3949 0.6420 0.089 Uiso 1 1 calc R A 1
C6 C 0.7941(5) 0.4661(7) 0.5855(3) 0.104(4) Uiso 0.80 1 d PD B 1
H6A H 0.8229 0.5119 0.5825 0.124 Uiso 0.80 1 calc PR B 1
H6B H 0.7605 0.4968 0.5752 0.124 Uiso 0.80 1 calc PR B 1
C7 C 0.8044(5) 0.3893(7) 0.5484(3) 0.054(4) Uiso 0.50 1 d PD B 1
H7A H 0.8276 0.3440 0.5655 0.065 Uiso 0.50 1 calc PR B 1
H7B H 0.7698 0.3585 0.5420 0.065 Uiso 0.50 1 calc PR B 1
C8 C 0.8286(5) 0.4058(16) 0.4984(5) 0.084(8) Uiso 0.30 1 d PD B 1
H8A H 0.8236 0.3463 0.4815 0.101 Uiso 0.30 1 calc PR B 1
H8B H 0.8028 0.4478 0.4821 0.101 Uiso 0.30 1 calc PR B 1
C9 C 0.8822(4) 0.4390(13) 0.4806(6) 0.059(6) Uiso 0.30 1 d PD B 1
H9A H 0.9006 0.3792 0.4833 0.071 Uiso 0.30 1 calc PR B 1
H9B H 0.8933 0.4709 0.5111 0.071 Uiso 0.30 1 calc PR B 1
C10 C 0.9231(7) 0.4852(13) 0.4474(5) 0.144(14) Uiso 0.30 1 d PD B 1
H10A H 0.9438 0.5284 0.4683 0.173 Uiso 0.30 1 calc PR B 1
H10B H 0.9482 0.4367 0.4375 0.173 Uiso 0.30 1 calc PR B 1
C11 C 0.9064(12) 0.5376(16) 0.4007(7) 0.147(11) Uiso 0.40 1 d PD B 1
C20 C 0.7235(3) 0.8037(6) 0.8286(3) 0.078(3) Uani 1 1 d . . .
C21 C 0.7206(3) 0.8518(6) 0.7759(3) 0.083(3) Uani 1 1 d . . .
H21A H 0.6843 0.8765 0.7704 0.100 Uiso 1 1 calc R . .
H21B H 0.7455 0.9043 0.7764 0.100 Uiso 1 1 calc R . .
C22 C 0.7795(3) 0.7663(6) 0.8407(3) 0.078(3) Uani 1 1 d . . .
H22A H 0.8048 0.8182 0.8416 0.094 Uiso 1 1 calc R . .
H22B H 0.7795 0.7392 0.8740 0.094 Uiso 1 1 calc R . .
C23 C 0.6818(3) 0.7247(6) 0.8337(3) 0.073(3) Uani 1 1 d . . .
H23A H 0.6849 0.6997 0.8673 0.088 Uiso 1 1 calc R . .
H23B H 0.6456 0.7511 0.8295 0.088 Uiso 1 1 calc R . .
C24 C 0.7477(4) 0.9437(6) 0.8814(4) 0.157(5) Uani 1 1 d D . .
H24A H 0.7704 0.9178 0.9082 0.189 Uiso 1 1 calc R . .
H24B H 0.7708 0.9570 0.8536 0.189 Uiso 1 1 calc R . .
C25 C 0.7234(4) 1.0314(5) 0.8986(3) 0.120(3) Uiso 1 1 d D . .
C26 C 0.6955(4) 1.0285(7) 0.9427(3) 0.102(3) Uani 1 1 d . . .
C27 C 0.6922(4) 0.9458(7) 0.9707(3) 0.108(4) Uani 1 1 d . . .
H27 H 0.7067 0.8901 0.9592 0.129 Uiso 1 1 calc R . .
C28 C 0.6653(4) 0.9501(7) 1.0179(3) 0.123(4) Uani 1 1 d . . .
H28 H 0.6627 0.8961 1.0371 0.148 Uiso 1 1 calc R . .
C29 C 0.6426(3) 1.0348(7) 1.0360(3) 0.091(3) Uani 1 1 d . . .
C30 C 0.6179(5) 1.0384(9) 1.0828(5) 0.159(5) Uiso 1 1 d . . .
H30 H 0.6149 0.9829 1.1006 0.191 Uiso 1 1 calc R . .
C31 C 0.5987(5) 1.1151(9) 1.1028(5) 0.158(5) Uiso 1 1 d . . .
H31 H 0.5839 1.1154 1.1344 0.189 Uiso 1 1 calc R . .
C32 C 0.6016(5) 1.1907(9) 1.0759(4) 0.160(5) Uiso 1 1 d . . .
H32 H 0.5886 1.2451 1.0904 0.192 Uiso 1 1 calc R . .
C33 C 0.6735(2) 1.1198(4) 0.96319(19) 0.120(3) Uiso 1 1 d G . .
C34 C 0.6471(3) 1.1190(5) 1.0084(2) 0.103(3) Uiso 1 1 d G . .
C35 C 0.6230(3) 1.2000(6) 1.0258(3) 0.150(4) Uiso 1 1 d G . .
C36 C 0.6253(3) 1.2819(5) 0.9980(3) 0.175(5) Uiso 1 1 d G . .
H36 H 0.6091 1.3362 1.0097 0.211 Uiso 1 1 calc R . .
C37 C 0.6517(3) 1.2828(4) 0.9528(3) 0.155(5) Uiso 1 1 d G . .
H37 H 0.6533 1.3376 0.9343 0.186 Uiso 1 1 calc R . .
C38 C 0.6759(3) 1.2017(5) 0.9354(2) 0.139(4) Uiso 1 1 d GD . .
C39 C 0.7021(4) 1.1995(7) 0.8897(3) 0.157(5) Uiso 1 1 d D . .
H39 H 0.7042 1.2535 0.8705 0.189 Uiso 1 1 calc R . .
C40 C 0.7256(5) 1.1149(6) 0.8726(4) 0.170(5) Uiso 1 1 d D . .
H40 H 0.7432 1.1157 0.8423 0.204 Uiso 1 1 calc R . .
C41 C 1.0040(4) 0.5713(7) 0.8413(3) 0.094(4) Uiso 0.70 1 d PD . .
H41A H 0.9959 0.6212 0.8177 0.113 Uiso 0.70 1 calc PR . .
H41B H 0.9697 0.5521 0.8551 0.113 Uiso 0.70 1 calc PR . .
C42 C 1.0373(5) 0.6129(8) 0.8832(4) 0.134(6) Uiso 0.70 1 d PD . .
H42A H 1.0704 0.6376 0.8693 0.161 Uiso 0.70 1 calc PR . .
H42B H 1.0479 0.5628 0.9058 0.161 Uiso 0.70 1 calc PR . .
C43 C 1.0111(6) 0.6922(9) 0.9147(5) 0.131(8) Uiso 0.50 1 d PD . .
H43A H 1.0379 0.7334 0.9302 0.158 Uiso 0.50 1 calc PR . .
H43B H 0.9845 0.7284 0.8956 0.158 Uiso 0.50 1 calc PR . .
C44 C 0.9857(10) 0.6286(15) 0.9513(8) 0.114(11) Uiso 0.30 1 d PD . .
H44A H 0.9476 0.6420 0.9527 0.171 Uiso 0.30 1 calc PR . .
H44B H 1.0024 0.6378 0.9837 0.171 Uiso 0.30 1 calc PR . .
H44C H 0.9907 0.5649 0.9411 0.171 Uiso 0.30 1 calc PR . .
C45 C 0.9839(4) 0.4848(7) 0.7683(3) 0.078(3) Uiso 0.70 1 d PD . .
H45A H 0.9479 0.4788 0.7818 0.094 Uiso 0.70 1 calc PR . .
H45B H 0.9849 0.5436 0.7504 0.094 Uiso 0.70 1 calc PR . .
C46 C 0.9914(4) 0.4067(7) 0.7311(3) 0.094(4) Uiso 0.70 1 d PD . .
H46A H 1.0264 0.4149 0.7159 0.112 Uiso 0.70 1 calc PR . .
H46B H 0.9926 0.3480 0.7492 0.112 Uiso 0.70 1 calc PR . .
C47 C 0.9487(4) 0.3987(7) 0.6900(3) 0.102(4) Uiso 0.70 1 d PD . .
H47A H 0.9527 0.3402 0.6722 0.122 Uiso 0.70 1 calc PR . .
H47B H 0.9127 0.4010 0.7036 0.122 Uiso 0.70 1 calc PR . .
C48 C 0.9568(7) 0.4775(9) 0.6565(5) 0.102(6) Uiso 0.50 1 d PD . .
H48A H 0.9781 0.5246 0.6735 0.153 Uiso 0.50 1 calc PR . .
H48B H 0.9222 0.5032 0.6464 0.153 Uiso 0.50 1 calc PR . .
H48C H 0.9755 0.4567 0.6276 0.153 Uiso 0.50 1 calc PR . .
C49 C 1.0352(4) 0.4023(7) 0.8404(4) 0.071(4) Uiso 0.60 1 d PD . .
H49A H 1.0514 0.3567 0.8186 0.085 Uiso 0.60 1 calc PR . .
H49B H 1.0610 0.4150 0.8676 0.085 Uiso 0.60 1 calc PR . .
C50 C 0.9851(5) 0.3623(7) 0.8611(6) 0.095(5) Uiso 0.50 1 d PD . .
H50A H 0.9562 0.3653 0.8358 0.114 Uiso 0.50 1 calc PR . .
H50B H 0.9743 0.4002 0.8891 0.114 Uiso 0.50 1 calc PR . .
C51 C 0.9914(6) 0.2626(9) 0.8782(7) 0.096(9) Uiso 0.30 1 d PD . .
H51A H 0.9587 0.2475 0.8958 0.116 Uiso 0.30 1 calc PR . .
H51B H 0.9906 0.2246 0.8482 0.116 Uiso 0.30 1 calc PR . .
C52 C 1.0369(7) 0.227(2) 0.9095(9) 0.122(12) Uiso 0.30 1 d PD . .
H52A H 1.0682 0.2189 0.8893 0.183 Uiso 0.30 1 calc PR . .
H52B H 1.0271 0.1684 0.9239 0.183 Uiso 0.30 1 calc PR . .
H52C H 1.0452 0.2713 0.9356 0.183 Uiso 0.30 1 calc PR . .
C53 C 1.0780(4) 0.5228(8) 0.7914(4) 0.072(4) Uiso 0.50 1 d PD . .
H53A H 1.1026 0.5316 0.8200 0.086 Uiso 0.50 1 calc PR . .
H53B H 1.0923 0.4707 0.7726 0.086 Uiso 0.50 1 calc PR . .
C54 C 1.0838(4) 0.6074(8) 0.7593(5) 0.081(5) Uani 0.50 1 d PD . .
H54A H 1.0604 0.5991 0.7298 0.098 Uiso 0.50 1 calc PR . .
H54B H 1.0699 0.6605 0.7775 0.098 Uiso 0.50 1 calc PR . .
C55 C 1.1385(5) 0.6318(9) 0.7424(7) 0.084(8) Uiso 0.30 1 d PD . .
H55A H 1.1496 0.5818 0.7205 0.101 Uiso 0.30 1 calc PR . .
H55B H 1.1625 0.6293 0.7717 0.101 Uiso 0.30 1 calc PR . .
C56 C 1.1501(10) 0.7209(11) 0.7164(8) 0.087(8) Uiso 0.30 1 d PD . .
H56A H 1.1313 0.7217 0.6845 0.131 Uiso 0.30 1 calc PR . .
H56B H 1.1885 0.7261 0.7117 0.131 Uiso 0.30 1 calc PR . .
H56C H 1.1381 0.7724 0.7362 0.131 Uiso 0.30 1 calc PR . .
C57 C 0.5134(4) 0.8304(6) 0.7369(3) 0.128(4) Uani 1 1 d D . .
H57A H 0.5165 0.7744 0.7572 0.154 Uiso 1 1 calc R . .
H57B H 0.5488 0.8427 0.7234 0.154 Uiso 1 1 calc R . .
C58 C 0.4993(5) 0.9100(9) 0.7703(4) 0.114(5) Uiso 0.60 1 d PD . .
H58A H 0.4654 0.8970 0.7865 0.137 Uiso 0.60 1 calc PR . .
H58B H 0.4947 0.9667 0.7507 0.137 Uiso 0.60 1 calc PR . .
C59 C 0.5447(5) 0.9236(9) 0.8096(4) 0.125(6) Uiso 0.60 1 d PD . .
H59A H 0.5793 0.9187 0.7933 0.150 Uiso 0.60 1 calc PR . .
H59B H 0.5421 0.9866 0.8228 0.150 Uiso 0.60 1 calc PR . .
C60 C 0.5451(8) 0.8565(10) 0.8528(5) 0.149(7) Uiso 0.60 1 d PD . .
H60A H 0.5299 0.8864 0.8813 0.223 Uiso 0.60 1 calc PR . .
H60B H 0.5818 0.8380 0.8608 0.223 Uiso 0.60 1 calc PR . .
H60C H 0.5239 0.8024 0.8440 0.223 Uiso 0.60 1 calc PR . .
C61 C 0.4979(4) 0.7302(6) 0.6633(4) 0.164(5) Uani 1 1 d D . .
H61A H 0.5330 0.7509 0.6520 0.197 Uiso 1 1 calc R . .
H61B H 0.5048 0.6788 0.6862 0.197 Uiso 1 1 calc R . .
C62 C 0.4679(5) 0.6900(8) 0.6183(4) 0.103(5) Uiso 0.60 1 d PD . .
H62A H 0.4603 0.7392 0.5942 0.123 Uiso 0.60 1 calc PR . .
H62B H 0.4336 0.6639 0.6284 0.123 Uiso 0.60 1 calc PR . .
C63 C 0.5017(4) 0.6148(7) 0.5948(4) 0.185(7) Uani 1 1 d D . .
H63A H 0.5347 0.6436 0.5831 0.222 Uiso 1 1 calc R . .
H63B H 0.5124 0.5705 0.6207 0.222 Uiso 1 1 calc R . .
C64 C 0.4766(7) 0.5618(11) 0.5527(5) 0.102(6) Uiso 0.50 1 d PD . .
H64A H 0.4441 0.5317 0.5635 0.154 Uiso 0.50 1 calc PR . .
H64B H 0.5016 0.5154 0.5415 0.154 Uiso 0.50 1 calc PR . .
H64C H 0.4677 0.6038 0.5257 0.154 Uiso 0.50 1 calc PR . .
C65 C 0.4661(3) 0.8986(6) 0.6629(4) 0.144(5) Uani 1 1 d D . .
H65A H 0.4402 0.8848 0.6360 0.173 Uiso 1 1 calc R . .
H65B H 0.4501 0.9463 0.6837 0.173 Uiso 1 1 calc R . .
C66 C 0.5163(5) 0.9379(8) 0.6409(5) 0.094(5) Uiso 0.50 1 d PD . .
H66A H 0.5339 0.8911 0.6208 0.112 Uiso 0.50 1 calc PR . .
H66B H 0.5416 0.9581 0.6671 0.112 Uiso 0.50 1 calc PR . .
C67 C 0.4985(5) 1.0203(9) 0.6088(6) 0.136(8) Uiso 0.50 1 d PD . .
H67A H 0.4761 0.9974 0.5811 0.163 Uiso 0.50 1 calc PR . .
H67B H 0.4763 1.0614 0.6285 0.163 Uiso 0.50 1 calc PR . .
C68 C 0.5441(7) 1.0750(17) 0.5887(11) 0.194(15) Uiso 0.40 1 d PD . .
H68A H 0.5778 1.0518 0.6026 0.292 Uiso 0.40 1 calc PR . .
H68B H 0.5400 1.1396 0.5975 0.292 Uiso 0.40 1 calc PR . .
H68C H 0.5440 1.0689 0.5530 0.292 Uiso 0.40 1 calc PR . .
C69 C 0.4182(4) 0.7780(7) 0.7108(4) 0.115(5) Uiso 0.70 1 d PD . .
H69A H 0.4020 0.8299 0.7283 0.138 Uiso 0.70 1 calc PR . .
H69B H 0.3961 0.7682 0.6806 0.138 Uiso 0.70 1 calc PR . .
C70 C 0.4113(4) 0.6920(9) 0.7431(6) 0.135(6) Uiso 0.60 1 d PD . .
H70A H 0.4263 0.7057 0.7762 0.162 Uiso 0.60 1 calc PR . .
H70B H 0.4328 0.6419 0.7294 0.162 Uiso 0.60 1 calc PR . .
C71 C 0.3532(5) 0.6562(17) 0.7487(9) 0.085(8) Uiso 0.30 1 d PD . .
C73 C 0.7394(4) 0.9820(7) 0.5670(3) 0.065(3) Uiso 0.60 1 d PD . .
H73A H 0.7205 0.9345 0.5857 0.078 Uiso 0.60 1 calc PR . .
H73B H 0.7739 0.9933 0.5844 0.078 Uiso 0.60 1 calc PR . .
C74 C 0.7071(6) 1.0693(8) 0.5690(4) 0.072(5) Uiso 0.40 1 d PD . .
H74A H 0.7203 1.1129 0.5444 0.087 Uiso 0.40 1 calc PR . .
H74B H 0.6694 1.0552 0.5603 0.087 Uiso 0.40 1 calc PR . .
C75 C 0.7099(5) 1.1135(11) 0.6186(4) 0.108(6) Uiso 0.50 1 d PD . .
H75A H 0.7023 1.0671 0.6438 0.129 Uiso 0.50 1 calc PR . .
H75B H 0.6822 1.1616 0.6201 0.129 Uiso 0.50 1 calc PR . .
C76 C 0.7639(5) 1.1557(11) 0.6295(6) 0.099(6) Uiso 0.50 1 d PD . .
H76A H 0.7918 1.1139 0.6190 0.149 Uiso 0.50 1 calc PR . .
H76B H 0.7681 1.1668 0.6648 0.149 Uiso 0.50 1 calc PR . .
H76C H 0.7668 1.2139 0.6119 0.149 Uiso 0.50 1 calc PR . .
C77 C 0.6976(4) 0.9268(8) 0.4918(4) 0.080(4) Uiso 0.60 1 d PD . .
H77A H 0.7039 0.9069 0.4578 0.096 Uiso 0.60 1 calc PR . .
H77B H 0.6797 0.9871 0.4896 0.096 Uiso 0.60 1 calc PR . .
C78 C 0.6583(4) 0.8597(9) 0.5134(4) 0.099(5) Uiso 0.60 1 d PD . .
H78A H 0.6428 0.8886 0.5425 0.118 Uiso 0.60 1 calc PR . .
H78B H 0.6783 0.8051 0.5249 0.118 Uiso 0.60 1 calc PR . .
C79 C 0.6109(4) 0.8264(10) 0.4782(5) 0.129(6) Uiso 0.60 1 d PD . .
H79A H 0.5921 0.8819 0.4661 0.154 Uiso 0.60 1 calc PR . .
H79B H 0.6271 0.7976 0.4494 0.154 Uiso 0.60 1 calc PR . .
C80 C 0.5691(6) 0.7616(11) 0.4955(6) 0.148(7) Uiso 0.60 1 d PD . .
H80A H 0.5784 0.6989 0.4863 0.223 Uiso 0.60 1 calc PR . .
H80B H 0.5346 0.7778 0.4804 0.223 Uiso 0.60 1 calc PR . .
H80C H 0.5670 0.7657 0.5312 0.223 Uiso 0.60 1 calc PR . .
C81 C 0.7824(4) 1.0025(8) 0.4827(4) 0.079(4) Uiso 0.60 1 d PD . .
H81A H 0.7595 1.0550 0.4729 0.094 Uiso 0.60 1 calc PR . .
H81B H 0.7897 0.9673 0.4526 0.094 Uiso 0.60 1 calc PR . .
C82 C 0.8352(5) 1.0403(10) 0.5031(5) 0.082(6) Uiso 0.40 1 d PD . .
H82A H 0.8598 0.9888 0.5104 0.098 Uiso 0.40 1 calc PR . .
H82B H 0.8289 1.0732 0.5341 0.098 Uiso 0.40 1 calc PR . .
C83 C 0.8613(5) 1.1065(8) 0.4664(5) 0.095(5) Uiso 0.50 1 d PD . .
H83A H 0.8907 1.1378 0.4846 0.114 Uiso 0.50 1 calc PR . .
H83B H 0.8780 1.0678 0.4414 0.114 Uiso 0.50 1 calc PR . .
C84 C 0.8305(6) 1.1802(10) 0.4390(6) 0.106(6) Uiso 0.50 1 d PD . .
H84A H 0.7927 1.1638 0.4373 0.158 Uiso 0.50 1 calc PR . .
H84B H 0.8439 1.1858 0.4059 0.158 Uiso 0.50 1 calc PR . .
H84C H 0.8349 1.2387 0.4562 0.158 Uiso 0.50 1 calc PR . .
C85 C 0.7796(5) 0.8516(6) 0.5280(3) 0.094(4) Uiso 0.70 1 d PD . .
H85A H 0.8121 0.8652 0.5480 0.112 Uiso 0.70 1 calc PR . .
H85B H 0.7561 0.8137 0.5482 0.112 Uiso 0.70 1 calc PR . .
C86 C 0.7955(5) 0.7957(7) 0.4839(4) 0.099(5) Uiso 0.60 1 d PD . .
H86A H 0.8157 0.8347 0.4613 0.119 Uiso 0.60 1 calc PR . .
H86B H 0.7631 0.7736 0.4661 0.119 Uiso 0.60 1 calc PR . .
C87 C 0.8299(7) 0.7135(11) 0.5001(8) 0.070(7) Uiso 0.30 1 d PD . .
H87A H 0.8628 0.7356 0.5162 0.105 Uiso 0.30 1 calc PR . .
H87B H 0.8386 0.6768 0.4715 0.105 Uiso 0.30 1 calc PR . .
H87C H 0.8102 0.6758 0.5231 0.105 Uiso 0.30 1 calc PR . .
C9' C 0.8541(7) 0.3485(12) 0.5470(7) 0.062(6) Uiso 0.30 1 d PD C 2
C10' C 0.8911(8) 0.4191(14) 0.5194(4) 0.042(8) Uiso 0.20 1 d PD C 2
C11' C 0.8822(14) 0.430(3) 0.4618(4) 0.10(3) Uiso 0.10 1 d PD C 2
C12' C 0.9030(12) 0.4652(15) 0.4105(6) 0.15(2) Uiso 0.20 1 d PD C 2
C13' C 0.8835(10) 0.5187(15) 0.3699(7) 0.083(8) Uiso 0.30 1 d PD C 2
C8' C 0.7894(13) 0.347(2) 0.5584(11) 0.097(10) Uiso 0.30 1 d P C 2
 
loop_
 _atom_site_aniso_label
 _atom_site_aniso_U_11
 _atom_site_aniso_U_22
 _atom_site_aniso_U_33
 _atom_site_aniso_U_23
 _atom_site_aniso_U_13
 _atom_site_aniso_U_12
Mo1 0.0608(4) 0.0876(5) 0.0756(4) 0.0254(4) 0.0080(3) -0.0140(4)
Mo2 0.0451(3) 0.0781(5) 0.0743(4) 0.0137(3) -0.0064(3) 0.0033(3)
Mo3 0.0522(3) 0.0747(4) 0.0721(4) 0.0241(3) -0.0036(3) -0.0094(3)
Mo4 0.0395(3) 0.0861(5) 0.0698(4) 0.0185(3) -0.0018(3) -0.0040(3)
Mo5 0.0380(3) 0.0745(4) 0.0779(4) 0.0001(3) 0.0045(3) -0.0056(3)
Mo6 0.0538(4) 0.0945(5) 0.0671(4) 0.0293(4) -0.0032(3) 0.0026(4)
Mn1 0.0358(5) 0.0576(7) 0.0530(6) 0.0089(6) 0.0039(5) 0.0004(6)
O1 0.041(2) 0.059(3) 0.062(2) 0.002(2) 0.001(2) 0.001(2)
O2 0.046(2) 0.064(3) 0.067(3) 0.006(2) 0.003(2) 0.007(2)
O3 0.055(3) 0.070(3) 0.057(2) 0.003(2) 0.009(2) 0.008(3)
O4 0.047(3) 0.071(3) 0.073(3) -0.016(3) 0.005(2) 0.002(2)
O5 0.051(3) 0.057(3) 0.062(2) 0.008(2) 0.002(2) 0.007(2)
O6 0.043(2) 0.065(3) 0.072(3) 0.001(3) 0.010(2) -0.001(2)
O7 0.056(3) 0.108(4) 0.067(3) 0.025(3) 0.007(2) -0.004(3)
O8 0.061(3) 0.065(3) 0.081(3) 0.002(3) 0.004(2) -0.007(3)
O9 0.039(2) 0.090(4) 0.076(3) 0.017(3) -0.002(2) 0.006(3)
O10 0.048(3) 0.082(4) 0.080(3) 0.006(3) -0.003(2) -0.005(3)
O11 0.050(3) 0.079(3) 0.067(3) 0.016(3) 0.001(2) 0.004(3)
O12 0.041(2) 0.080(3) 0.078(3) -0.014(3) -0.002(2) 0.001(3)
O13 0.069(3) 0.097(4) 0.103(4) -0.002(3) 0.003(3) 0.010(3)
O14 0.073(3) 0.144(5) 0.082(3) 0.011(3) 0.025(3) -0.041(4)
O15 0.125(5) 0.077(4) 0.114(4) 0.041(3) -0.005(4) -0.001(4)
O16 0.094(4) 0.084(4) 0.092(3) 0.046(3) -0.008(3) 0.014(3)
O17 0.067(3) 0.124(5) 0.071(3) 0.020(3) -0.009(3) -0.006(3)
O18 0.065(3) 0.118(4) 0.073(3) 0.026(3) 0.010(3) -0.020(3)
O19 0.059(3) 0.115(4) 0.067(3) 0.001(3) -0.015(2) -0.007(3)
O20 0.051(3) 0.096(4) 0.094(3) -0.013(3) 0.022(2) -0.007(3)
O21 0.064(3) 0.082(4) 0.088(3) 0.002(3) -0.008(3) -0.014(3)
O22 0.058(3) 0.096(4) 0.082(3) 0.009(3) 0.001(3) -0.001(3)
O23 0.049(3) 0.113(4) 0.082(3) 0.019(3) 0.011(2) -0.003(3)
O24 0.078(3) 0.099(4) 0.108(4) 0.003(3) -0.008(3) -0.028(3)
N1 0.080(4) 0.124(6) 0.113(5) -0.022(5) 0.007(4) -0.046(4)
N2 0.079(5) 0.246(9) 0.156(6) -0.115(6) 0.013(5) 0.026(6)
N3 0.078(4) 0.124(6) 0.168(7) 0.043(5) 0.040(5) 0.047(5)
N4 0.191(9) 0.170(9) 0.085(5) -0.004(6) -0.001(6) -0.035(8)
C1 0.059(4) 0.094(6) 0.054(4) 0.009(4) 0.006(3) 0.026(4)
C2 0.056(4) 0.089(6) 0.061(4) 0.001(4) 0.004(4) 0.001(4)
C3 0.052(4) 0.081(6) 0.067(4) -0.006(4) 0.007(4) -0.005(4)
C4 0.054(4) 0.086(6) 0.087(5) 0.020(5) 0.001(4) 0.011(4)
C5 0.077(5) 0.078(6) 0.067(4) -0.009(4) 0.008(4) 0.025(5)
C20 0.072(5) 0.108(7) 0.056(4) -0.024(4) -0.009(4) -0.003(5)
C21 0.055(4) 0.086(6) 0.109(6) 0.011(5) -0.006(4) -0.025(4)
C22 0.049(4) 0.108(7) 0.077(5) 0.002(5) -0.014(4) -0.001(5)
C23 0.049(4) 0.102(6) 0.070(4) -0.015(5) 0.015(4) -0.005(4)
C24 0.139(9) 0.173(12) 0.162(9) -0.056(9) 0.052(8) 0.005(9)
C26 0.114(7) 0.110(7) 0.081(5) 0.033(5) 0.011(5) 0.000(6)
C27 0.115(7) 0.093(7) 0.115(7) -0.006(6) -0.003(6) 0.022(6)
C28 0.144(9) 0.125(9) 0.101(7) 0.022(7) 0.003(7) -0.015(7)
C29 0.088(5) 0.119(7) 0.065(5) 0.001(5) 0.017(4) 0.024(6)
C54 0.039(8) 0.092(12) 0.112(11) -0.040(10) -0.006(8) 0.011(9)
C57 0.115(8) 0.145(10) 0.124(8) 0.003(7) -0.007(7) 0.033(7)
C61 0.110(7) 0.138(10) 0.247(13) 0.011(10) 0.050(8) 0.055(7)
C63 0.125(10) 0.217(15) 0.214(13) -0.057(12) 0.008(10) 0.003(10)
C65 0.103(7) 0.149(10) 0.183(10) 0.040(8) 0.047(7) 0.054(7)
 
_geom_special_details
;
 All s.u.'s (except the s.u. in the dihedral angle between two l.s. planes)
 are estimated using the full covariance matrix.  The cell s.u.'s are taken
 into account individually in the estimation of s.u.'s in distances, angles
 and torsion angles; correlations between s.u.'s in cell parameters are only
 used when they are defined by crystal symmetry.  An approximate (isotropic)
 treatment of cell s.u.'s is used for estimating s.u.'s involving l.s. planes.
;
 
loop_
 _geom_bond_atom_site_label_1
 _geom_bond_atom_site_label_2
 _geom_bond_distance
 _geom_bond_site_symmetry_2
 _geom_bond_publ_flag
Mo1 O15 1.691(6) . ?
Mo1 O14 1.717(5) . ?
Mo1 O8 1.927(5) . ?
Mo1 O7 1.931(5) . ?
Mo1 O6 2.345(5) . ?
Mo1 O3 2.367(4) . ?
Mo2 O19 1.676(5) . ?
Mo2 O13 1.689(6) . ?
Mo2 O12 1.915(4) . ?
Mo2 O11 1.929(4) . ?
Mo2 O4 2.337(4) . ?
Mo2 O1 2.370(4) . ?
Mo3 O24 1.625(6) . ?
Mo3 O18 1.713(5) . ?
Mo3 O11 1.923(4) . ?
Mo3 O10 1.932(4) . ?
Mo3 O2 2.346(4) . ?
Mo3 O4 2.350(4) . ?
Mo4 O22 1.671(5) . ?
Mo4 O23 1.702(5) . ?
Mo4 O9 1.895(5) . ?
Mo4 O10 1.922(5) . ?
Mo4 O2 2.332(4) . ?
Mo4 O5 2.387(4) . ?
Mo5 O21 1.687(5) . ?
Mo5 O20 1.699(5) . ?
Mo5 O12 1.931(5) . ?
Mo5 O8 1.933(5) . ?
Mo5 O6 2.331(4) . ?
Mo5 O1 2.382(4) . ?
Mo6 O16 1.687(5) . ?
Mo6 O17 1.689(5) . ?
Mo6 O7 1.914(4) . ?
Mo6 O9 1.924(4) . ?
Mo6 O3 2.319(4) . ?
Mo6 O5 2.381(4) . ?
Mn1 O5 1.908(4) . ?
Mn1 O1 1.929(4) . ?
Mn1 O3 1.974(5) . ?
Mn1 O4 1.991(5) . ?
Mn1 O6 2.026(4) . ?
Mn1 O2 2.035(4) . ?
O1 C2 1.465(8) . ?
O2 C1 1.400(8) . ?
O3 C4 1.450(8) . ?
O4 C21 1.412(9) . ?
O5 C22 1.426(9) . ?
O6 C23 1.424(8) . ?
N1 C20 1.472(10) . ?
N1 C24 1.482(10) . ?
N2 C49 1.491(11) . ?
N2 C41 1.501(10) . ?
N2 C53 1.511(11) . ?
N2 C45 1.519(10) . ?
N3 C57 1.500(10) . ?
N3 C65 1.521(10) . ?
N3 C69 1.539(11) . ?
N3 C61 1.542(10) . ?
N4 C77 1.474(10) . ?
N4 C81 1.480(11) . ?
N4 C85 1.498(11) . ?
N4 C73 1.512(10) . ?
C1 C3 1.594(10) . ?
C2 C3 1.534(10) . ?
C3 C5 1.512(10) . ?
C3 C4 1.542(10) . ?
C5 C6 1.487(9) . ?
C6 C7 1.508(11) . ?
C7 C8 1.498(13) . ?
C8 C9 1.494(14) . ?
C9 C10 1.513(15) . ?
C10 C11 1.508(17) . ?
C20 C22 1.507(10) . ?
C20 C23 1.536(11) . ?
C20 C21 1.570(10) . ?
C24 C25 1.470(10) . ?
C25 C26 1.384(12) . ?
C25 C40 1.386(11) . ?
C26 C27 1.404(12) . ?
C26 C33 1.521(11) . ?
C27 C28 1.446(13) . ?
C28 C29 1.424(13) . ?
C29 C30 1.410(14) . ?
C29 C34 1.419(11) . ?
C30 C31 1.316(17) . ?
C31 C32 1.301(17) . ?
C32 C35 1.463(13) . ?
C33 C34 1.3900 . ?
C33 C38 1.3900 . ?
C34 C35 1.3900 . ?
C35 C36 1.3900 . ?
C36 C37 1.3900 . ?
C37 C38 1.3900 . ?
C38 C39 1.401(10) . ?
C39 C40 1.423(12) . ?
C41 C42 1.495(12) . ?
C42 C43 1.566(14) . ?
C43 C44 1.488(16) . ?
C45 C46 1.512(11) . ?
C46 C47 1.505(12) . ?
C47 C48 1.458(13) . ?
C49 C50 1.480(13) . ?
C50 C51 1.505(14) . ?
C51 C52 1.470(17) . ?
C53 C54 1.494(13) . ?
C54 C55 1.474(14) . ?
C55 C56 1.485(16) . ?
C57 C58 1.495(12) . ?
C58 C59 1.528(13) . ?
C59 C60 1.503(14) . ?
C61 C62 1.508(12) . ?
C62 C63 1.510(13) . ?
C63 C64 1.481(13) . ?
C65 C66 1.494(12) . ?
C66 C67 1.517(14) . ?
C67 C68 1.482(17) . ?
C69 C70 1.517(13) . ?
C70 C71 1.531(15) . ?
C73 C74 1.483(13) . ?
C74 C75 1.471(14) . ?
C75 C76 1.483(14) . ?
C77 C78 1.492(12) . ?
C78 C79 1.556(13) . ?
C79 C80 1.469(14) . ?
C81 C82 1.498(13) . ?
C82 C83 1.520(14) . ?
C83 C84 1.482(14) . ?
C85 C86 1.489(12) . ?
C86 C87 1.507(15) . ?
C9' C10' 1.562(16) . ?
C9' C8' 1.63(3) . ?
C10' C11' 1.560(14) . ?
C11' C12' 1.562(17) . ?
C12' C13' 1.404(17) . ?
 
loop_
 _geom_angle_atom_site_label_1
 _geom_angle_atom_site_label_2
 _geom_angle_atom_site_label_3
 _geom_angle
 _geom_angle_site_symmetry_1
 _geom_angle_site_symmetry_3
 _geom_angle_publ_flag
O15 Mo1 O14 104.8(3) . . ?
O15 Mo1 O8 97.1(2) . . ?
O14 Mo1 O8 102.8(2) . . ?
O15 Mo1 O7 102.4(3) . . ?
O14 Mo1 O7 98.9(2) . . ?
O8 Mo1 O7 146.0(2) . . ?
O15 Mo1 O6 159.5(2) . . ?
O14 Mo1 O6 94.4(2) . . ?
O8 Mo1 O6 71.48(18) . . ?
O7 Mo1 O6 81.05(18) . . ?
O15 Mo1 O3 90.9(2) . . ?
O14 Mo1 O3 162.8(2) . . ?
O8 Mo1 O3 81.72(17) . . ?
O7 Mo1 O3 70.42(17) . . ?
O6 Mo1 O3 71.07(15) . . ?
O19 Mo2 O13 105.4(3) . . ?
O19 Mo2 O12 101.4(2) . . ?
O13 Mo2 O12 99.0(2) . . ?
O19 Mo2 O11 99.5(2) . . ?
O13 Mo2 O11 101.4(2) . . ?
O12 Mo2 O11 145.59(18) . . ?
O19 Mo2 O4 160.6(2) . . ?
O13 Mo2 O4 93.4(2) . . ?
O12 Mo2 O4 79.96(17) . . ?
O11 Mo2 O4 71.49(16) . . ?
O19 Mo2 O1 92.1(2) . . ?
O13 Mo2 O1 161.5(2) . . ?
O12 Mo2 O1 70.90(17) . . ?
O11 Mo2 O1 81.34(17) . . ?
O4 Mo2 O1 69.91(15) . . ?
O24 Mo3 O18 105.8(3) . . ?
O24 Mo3 O11 102.4(2) . . ?
O18 Mo3 O11 97.8(2) . . ?
O24 Mo3 O10 97.0(2) . . ?
O18 Mo3 O10 102.8(2) . . ?
O11 Mo3 O10 146.6(2) . . ?
O24 Mo3 O2 159.5(2) . . ?
O18 Mo3 O2 93.4(2) . . ?
O11 Mo3 O2 81.62(17) . . ?
O10 Mo3 O2 71.25(18) . . ?
O24 Mo3 O4 90.0(2) . . ?
O18 Mo3 O4 162.7(2) . . ?
O11 Mo3 O4 71.29(16) . . ?
O10 Mo3 O4 81.88(17) . . ?
O2 Mo3 O4 72.07(15) . . ?
O22 Mo4 O23 106.4(2) . . ?
O22 Mo4 O9 100.7(2) . . ?
O23 Mo4 O9 99.2(2) . . ?
O22 Mo4 O10 98.7(2) . . ?
O23 Mo4 O10 102.3(2) . . ?
O9 Mo4 O10 145.55(19) . . ?
O22 Mo4 O2 159.64(19) . . ?
O23 Mo4 O2 93.31(19) . . ?
O9 Mo4 O2 80.44(17) . . ?
O10 Mo4 O2 71.74(17) . . ?
O22 Mo4 O5 90.44(19) . . ?
O23 Mo4 O5 162.0(2) . . ?
O9 Mo4 O5 70.87(17) . . ?
O10 Mo4 O5 80.80(17) . . ?
O2 Mo4 O5 70.59(14) . . ?
O21 Mo5 O20 104.8(2) . . ?
O21 Mo5 O12 101.1(2) . . ?
O20 Mo5 O12 99.6(2) . . ?
O21 Mo5 O8 97.5(2) . . ?
O20 Mo5 O8 102.8(2) . . ?
O12 Mo5 O8 146.08(19) . . ?
O21 Mo5 O6 159.4(2) . . ?
O20 Mo5 O6 94.84(19) . . ?
O12 Mo5 O6 81.33(17) . . ?
O8 Mo5 O6 71.69(18) . . ?
O21 Mo5 O1 90.43(19) . . ?
O20 Mo5 O1 163.4(2) . . ?
O12 Mo5 O1 70.37(17) . . ?
O8 Mo5 O1 81.44(17) . . ?
O6 Mo5 O1 70.96(14) . . ?
O16 Mo6 O17 105.4(3) . . ?
O16 Mo6 O7 102.1(2) . . ?
O17 Mo6 O7 97.8(2) . . ?
O16 Mo6 O9 99.8(2) . . ?
O17 Mo6 O9 101.8(2) . . ?
O7 Mo6 O9 145.51(19) . . ?
O16 Mo6 O3 92.8(2) . . ?
O17 Mo6 O3 160.8(2) . . ?
O7 Mo6 O3 71.80(17) . . ?
O9 Mo6 O3 80.82(16) . . ?
O16 Mo6 O5 160.5(2) . . ?
O17 Mo6 O5 93.3(2) . . ?
O7 Mo6 O5 80.25(18) . . ?
O9 Mo6 O5 70.56(17) . . ?
O3 Mo6 O5 69.38(15) . . ?
O5 Mn1 O1 179.8(2) . . ?
O5 Mn1 O3 87.12(18) . . ?
O1 Mn1 O3 92.72(18) . . ?
O5 Mn1 O4 93.25(19) . . ?
O1 Mn1 O4 86.92(18) . . ?
O3 Mn1 O4 179.57(18) . . ?
O5 Mn1 O6 92.36(18) . . ?
O1 Mn1 O6 87.49(17) . . ?
O3 Mn1 O6 86.41(18) . . ?
O4 Mn1 O6 93.80(18) . . ?
O5 Mn1 O2 87.42(17) . . ?
O1 Mn1 O2 92.73(17) . . ?
O3 Mn1 O2 93.15(18) . . ?
O4 Mn1 O2 86.64(18) . . ?
O6 Mn1 O2 179.52(19) . . ?
C2 O1 Mn1 117.6(4) . . ?
C2 O1 Mo2 119.1(4) . . ?
Mn1 O1 Mo2 101.95(19) . . ?
C2 O1 Mo5 121.7(4) . . ?
Mn1 O1 Mo5 101.37(17) . . ?
Mo2 O1 Mo5 90.22(14) . . ?
C1 O2 Mn1 116.0(4) . . ?
C1 O2 Mo4 122.4(4) . . ?
Mn1 O2 Mo4 100.00(17) . . ?
C1 O2 Mo3 121.6(4) . . ?
Mn1 O2 Mo3 100.02(17) . . ?
Mo4 O2 Mo3 91.60(16) . . ?
C4 O3 Mn1 114.8(4) . . ?
C4 O3 Mo6 120.9(4) . . ?
Mn1 O3 Mo6 101.82(19) . . ?
C4 O3 Mo1 122.2(4) . . ?
Mn1 O3 Mo1 101.67(18) . . ?
Mo6 O3 Mo1 91.16(14) . . ?
C21 O4 Mn1 114.7(4) . . ?
C21 O4 Mo2 121.5(4) . . ?
Mn1 O4 Mo2 101.21(19) . . ?
C21 O4 Mo3 122.3(4) . . ?
Mn1 O4 Mo3 101.26(18) . . ?
Mo2 O4 Mo3 91.35(15) . . ?
C22 O5 Mn1 116.8(4) . . ?
C22 O5 Mo6 120.4(4) . . ?
Mn1 O5 Mo6 101.67(19) . . ?
C22 O5 Mo4 121.6(4) . . ?
Mn1 O5 Mo4 101.99(17) . . ?
Mo6 O5 Mo4 89.36(14) . . ?
C23 O6 Mn1 114.3(4) . . ?
C23 O6 Mo5 123.3(4) . . ?
Mn1 O6 Mo5 100.17(17) . . ?
C23 O6 Mo1 121.7(4) . . ?
Mn1 O6 Mo1 100.84(18) . . ?
Mo5 O6 Mo1 91.71(16) . . ?
Mo6 O7 Mo1 121.0(2) . . ?
Mo1 O8 Mo5 120.8(2) . . ?
Mo4 O9 Mo6 122.8(2) . . ?
Mo4 O10 Mo3 121.0(3) . . ?
Mo3 O11 Mo2 121.0(2) . . ?
Mo2 O12 Mo5 122.2(2) . . ?
C20 N1 C24 116.6(7) . . ?
C49 N2 C41 116.0(7) . . ?
C49 N2 C53 107.9(7) . . ?
C41 N2 C53 105.3(8) . . ?
C49 N2 C45 116.8(7) . . ?
C41 N2 C45 102.4(6) . . ?
C53 N2 C45 107.5(7) . . ?
C57 N3 C65 109.8(7) . . ?
C57 N3 C69 113.5(7) . . ?
C65 N3 C69 107.7(6) . . ?
C57 N3 C61 107.9(6) . . ?
C65 N3 C61 111.7(7) . . ?
C69 N3 C61 106.3(7) . . ?
C77 N4 C81 106.7(7) . . ?
C77 N4 C85 112.0(8) . . ?
C81 N4 C85 112.7(8) . . ?
C77 N4 C73 105.3(8) . . ?
C81 N4 C73 116.2(8) . . ?
C85 N4 C73 103.8(6) . . ?
O2 C1 C3 115.2(5) . . ?
O1 C2 C3 113.9(5) . . ?
C5 C3 C2 107.6(6) . . ?
C5 C3 C4 106.6(6) . . ?
C2 C3 C4 110.8(6) . . ?
C5 C3 C1 110.3(6) . . ?
C2 C3 C1 110.4(6) . . ?
C4 C3 C1 111.1(6) . . ?
O3 C4 C3 116.6(6) . . ?
C6 C5 C3 119.8(7) . . ?
C5 C6 C7 119.3(8) . . ?
C8 C7 C6 123.4(12) . . ?
C9 C8 C7 135.4(13) . . ?
C8 C9 C10 159.3(14) . . ?
C11 C10 C9 122.3(17) . . ?
N1 C20 C22 111.7(6) . . ?
N1 C20 C23 103.6(6) . . ?
C22 C20 C23 109.2(7) . . ?
N1 C20 C21 107.7(7) . . ?
C22 C20 C21 111.6(6) . . ?
C23 C20 C21 112.9(6) . . ?
O4 C21 C20 115.7(6) . . ?
O5 C22 C20 115.3(6) . . ?
O6 C23 C20 115.2(6) . . ?
C25 C24 N1 113.0(8) . . ?
C26 C25 C40 118.9(9) . . ?
C26 C25 C24 117.2(8) . . ?
C40 C25 C24 123.9(9) . . ?
C25 C26 C27 121.3(9) . . ?
C25 C26 C33 118.1(7) . . ?
C27 C26 C33 120.3(7) . . ?
C26 C27 C28 117.8(9) . . ?
C29 C28 C27 121.7(9) . . ?
C30 C29 C34 118.3(9) . . ?
C30 C29 C28 121.0(9) . . ?
C34 C29 C28 120.6(7) . . ?
C31 C30 C29 124.1(12) . . ?
C32 C31 C30 116.3(13) . . ?
C31 C32 C35 127.6(12) . . ?
C34 C33 C38 120.0 . . ?
C34 C33 C26 119.1(5) . . ?
C38 C33 C26 120.7(4) . . ?
C33 C34 C35 120.0 . . ?
C33 C34 C29 120.4(5) . . ?
C35 C34 C29 119.6(5) . . ?
C36 C35 C34 120.0 . . ?
C36 C35 C32 126.1(7) . . ?
C34 C35 C32 113.6(7) . . ?
C35 C36 C37 120.0 . . ?
C38 C37 C36 120.0 . . ?
C37 C38 C33 120.0 . . ?
C37 C38 C39 121.6(6) . . ?
C33 C38 C39 118.4(6) . . ?
C38 C39 C40 120.2(9) . . ?
C25 C40 C39 123.3(10) . . ?
C42 C41 N2 121.0(9) . . ?
C41 C42 C43 117.9(10) . . ?
C44 C43 C42 95.7(12) . . ?
C46 C45 N2 117.0(8) . . ?
C47 C46 C45 116.4(9) . . ?
C48 C47 C46 106.6(10) . . ?
C50 C49 N2 112.6(8) . . ?
C49 C50 C51 113.6(11) . . ?
C52 C51 C50 124.8(16) . . ?
C54 C53 N2 123.8(9) . . ?
C55 C54 C53 118.0(10) . . ?
C54 C55 C56 122.5(15) . . ?
C58 C57 N3 116.4(8) . . ?
C57 C58 C59 109.4(10) . . ?
C60 C59 C58 116.0(12) . . ?
C62 C61 N3 122.0(8) . . ?
C61 C62 C63 110.0(9) . . ?
C64 C63 C62 117.4(10) . . ?
C66 C65 N3 115.4(7) . . ?
C65 C66 C67 106.7(9) . . ?
C68 C67 C66 114.0(14) . . ?
C70 C69 N3 121.8(8) . . ?
C69 C70 C71 116.5(13) . . ?
C74 C73 N4 118.0(8) . . ?
C75 C74 C73 112.5(10) . . ?
C74 C75 C76 112.0(12) . . ?
N4 C77 C78 120.3(9) . . ?
C77 C78 C79 116.5(9) . . ?
C80 C79 C78 121.5(12) . . ?
N4 C81 C82 116.7(9) . . ?
C81 C82 C83 111.6(10) . . ?
C84 C83 C82 122.9(12) . . ?
C86 C85 N4 115.3(8) . . ?
C85 C86 C87 110.4(11) . . ?
C10' C9' C8' 132.9(18) . . ?
C11' C10' C9' 117.9(18) . . ?
C10' C11' C12' 150(2) . . ?
C13' C12' C11' 138(3) . . ?
 
_diffrn_measured_fraction_theta_max    0.988
_diffrn_reflns_theta_full              50.00
_diffrn_measured_fraction_theta_full   0.988
_refine_diff_density_max    1.95 
_refine_diff_density_min   -0.64 
_refine_diff_density_rms    0.17 

 
data_mr377b
 
_audit_creation_method            SHELXL-97
_chemical_name_systematic
;
 ?
;
_chemical_name_common             ?
_chemical_melting_point           ?
_chemical_formula_moiety          
 '3(C16 H36 N +), (C26 H46 Mn Mo6 O24 3-), 2(C2 H3 N)'
_chemical_formula_sum
 'C78 H160 Mn Mo6 N5 O24'
_chemical_formula_weight          2182.69
 
loop_
 _atom_type_symbol
 _atom_type_description
 _atom_type_scat_dispersion_real
 _atom_type_scat_dispersion_imag
 _atom_type_scat_source
 'Mo'  'Mo'  -0.0483   2.7339
 'International Tables Vol C Tables 4.2.6.8 and 6.1.1.4'
 'Mn'  'Mn'  -0.5299   2.8052
 'International Tables Vol C Tables 4.2.6.8 and 6.1.1.4'
 'O'  'O'   0.0492   0.0322
 'International Tables Vol C Tables 4.2.6.8 and 6.1.1.4'
 'N'  'N'   0.0311   0.0180
 'International Tables Vol C Tables 4.2.6.8 and 6.1.1.4'
 'C'  'C'   0.0181   0.0091
 'International Tables Vol C Tables 4.2.6.8 and 6.1.1.4'
 'H'  'H'   0.0000   0.0000
 'International Tables Vol C Tables 4.2.6.8 and 6.1.1.4'
 
_symmetry_cell_setting            monoclinic
_symmetry_space_group_name_H-M    P2(1)/c
 
loop_
 _symmetry_equiv_pos_as_xyz
 'x, y, z'
 '-x, y+1/2, -z+1/2'
 '-x, -y, -z'
 'x, -y-1/2, z-1/2'
 
_cell_length_a                    23.9788(3)
_cell_length_b                    16.1403(3)
_cell_length_c                    25.4293(3)
_cell_angle_alpha                 90.00
_cell_angle_beta                  99.830(2)
_cell_angle_gamma                 90.00
_cell_volume                      9697.3(2)
_cell_formula_units_Z             4
_cell_measurement_temperature     293(2)
_cell_measurement_reflns_used     25346
_cell_measurement_theta_min       3.25
_cell_measurement_theta_max       67.5
 
_exptl_crystal_description        block
_exptl_crystal_colour             colourless
_exptl_crystal_size_max           0.19
_exptl_crystal_size_mid           0.15
_exptl_crystal_size_min           0.14
_exptl_crystal_density_meas       none
_exptl_crystal_density_diffrn     1.495
_exptl_crystal_density_method     'not measured'
_exptl_crystal_F_000              4528
_exptl_absorpt_coefficient_mu     7.733
_exptl_absorpt_correction_type    analytical
_exptl_absorpt_correction_T_min   0.411
_exptl_absorpt_correction_T_max   0.540
_exptl_absorpt_process_details    
;
CrysAlisPro, Oxford Diffraction Ltd.,
Version 1.171.33.55 (release 05-01-2010 CrysAlis171 .NET)
(compiled Jan  5 2010,16:28:46)
Analytical numeric absorption correction using a multifaceted crystal
			model based on expressions derived by R.C. Clark & J.S. Reid.
(Clark, R. C. & Reid, J. S. (1995). Acta Cryst. A51, 887-897)
;
 
_exptl_special_details
;
 ?
;
 
_diffrn_ambient_temperature       293(2)
_diffrn_radiation_wavelength      1.54184
_diffrn_radiation_type            CuK\a
_diffrn_radiation_source          'fine-focus sealed tube'
_diffrn_radiation_monochromator   graphite
_diffrn_measurement_device_type   'Oxford Xcalibur, Atlas, Gemini ultra'
_diffrn_measurement_method        '\w & \p scans'
_diffrn_detector_area_resol_mean  10.44
_diffrn_standards_number          71791
_diffrn_standards_interval_count  ?
_diffrn_standards_interval_time   ?
_diffrn_standards_decay_%         none
_diffrn_reflns_number             70117
_diffrn_reflns_av_R_equivalents   0.0503
_diffrn_reflns_av_sigmaI/netI     0.0385
_diffrn_reflns_limit_h_min        -28
_diffrn_reflns_limit_h_max        28
_diffrn_reflns_limit_k_min        -16
_diffrn_reflns_limit_k_max        19
_diffrn_reflns_limit_l_min        -30
_diffrn_reflns_limit_l_max        29
_diffrn_reflns_theta_min          3.26
_diffrn_reflns_theta_max          67.59
_reflns_number_total              17289
_reflns_number_gt                 12237
_reflns_threshold_expression      >2\s(I)
 
_computing_data_collection
;
CrysAlisPro, Oxford Diffraction Ltd.,
Version 1.171.33.55 (release 05-01-2010 CrysAlis171 .NET)
(compiled Jan  5 2010,16:28:46)
;
_computing_cell_refinement
;
CrysAlisPro, Oxford Diffraction Ltd.,
Version 1.171.33.55 (release 05-01-2010 CrysAlis171 .NET)
(compiled Jan  5 2010,16:28:46)
;
_computing_data_reduction
;
CrysAlisPro, Oxford Diffraction Ltd.,
Version 1.171.33.55 (release 05-01-2010 CrysAlis171 .NET)
(compiled Jan  5 2010,16:28:46)
;
_computing_structure_solution     'SHELXS-97 (Sheldrick, 2008)'
_computing_structure_refinement   'SHELXL-97 (Sheldrick, 2008)'
_computing_molecular_graphics     ?
_computing_publication_material   ?
 
_refine_special_details
;
 Refinement of F^2^ against ALL reflections.  The weighted R-factor wR and
 goodness of fit S are based on F^2^, conventional R-factors R are based
 on F, with F set to zero for negative F^2^. The threshold expression of
 F^2^ > 2\s(F^2^) is used only for calculating R-factors(gt) etc. and is
 not relevant to the choice of reflections for refinement.  R-factors based
 on F^2^ are statistically about twice as large as those based on F, and R-
 factors based on ALL data will be even larger.
;
 
_refine_ls_structure_factor_coef  Fsqd
_refine_ls_matrix_type            full
_refine_ls_weighting_scheme       calc
_refine_ls_weighting_details
 'calc w=1/[\s^2^(Fo^2^)+(0.0626P)^2^+49.7577P] where P=(Fo^2^+2Fc^2^)/3'
_atom_sites_solution_primary      direct
_atom_sites_solution_secondary    difmap
_atom_sites_solution_hydrogens    geom
_refine_ls_hydrogen_treatment     constr
_refine_ls_extinction_method      none
_refine_ls_extinction_coef        none
_refine_ls_number_reflns          17289
_refine_ls_number_parameters      940
_refine_ls_number_restraints      10
_refine_ls_R_factor_all           0.0802
_refine_ls_R_factor_gt            0.0539
_refine_ls_wR_factor_ref          0.1584
_refine_ls_wR_factor_gt           0.1406
_refine_ls_goodness_of_fit_ref    1.040
_refine_ls_restrained_S_all       1.041
_refine_ls_shift/su_max           0.001
_refine_ls_shift/su_mean          0.000
 
loop_
 _atom_site_label
 _atom_site_type_symbol
 _atom_site_fract_x
 _atom_site_fract_y
 _atom_site_fract_z
 _atom_site_U_iso_or_equiv
 _atom_site_adp_type
 _atom_site_occupancy
 _atom_site_symmetry_multiplicity
 _atom_site_calc_flag
 _atom_site_refinement_flags
 _atom_site_disorder_assembly
 _atom_site_disorder_group
Mo1 Mo 0.18915(2) 0.98390(4) 0.81173(2) 0.03967(14) Uani 1 1 d . . .
Mo2 Mo 0.16649(2) 0.70873(4) 0.66215(2) 0.04182(15) Uani 1 1 d . . .
Mo3 Mo 0.10923(2) 0.83891(4) 0.74062(2) 0.04186(15) Uani 1 1 d . . .
Mo4 Mo 0.30528(2) 0.72556(4) 0.65423(2) 0.03817(14) Uani 1 1 d . . .
Mo5 Mo 0.38612(2) 0.86940(4) 0.72651(2) 0.04222(15) Uani 1 1 d . . .
Mo6 Mo 0.32739(2) 0.99702(4) 0.80599(2) 0.04281(15) Uani 1 1 d . . .
Mn1 Mn 0.24739(4) 0.85356(6) 0.73325(4) 0.0313(2) Uani 1 1 d . . .
O1 O 0.20181(18) 0.8430(3) 0.79066(17) 0.0371(10) Uani 1 1 d . . .
O2 O 0.29307(18) 0.8643(3) 0.67573(18) 0.0392(10) Uani 1 1 d . . .
O3 O 0.36406(18) 0.7559(3) 0.71248(18) 0.0400(10) Uani 1 1 d . . .
O4 O 0.17441(19) 0.8506(3) 0.68100(18) 0.0434(11) Uani 1 1 d . . .
O5 O 0.1104(2) 0.7228(4) 0.6129(2) 0.0578(15) Uani 1 1 d . . .
O6 O 0.3127(2) 0.6206(3) 0.6591(2) 0.0506(12) Uani 1 1 d . . .
O7 O 0.0538(2) 0.8553(4) 0.6904(2) 0.0574(14) Uani 1 1 d . . .
O8 O 0.0804(2) 0.8136(3) 0.7950(2) 0.0523(13) Uani 1 1 d . . .
O9 O 0.13074(19) 0.9527(3) 0.75373(18) 0.0433(11) Uani 1 1 d . . .
O10 O 0.3336(2) 0.7518(3) 0.6000(2) 0.0498(12) Uani 1 1 d . . .
O11 O 0.32070(18) 0.8562(3) 0.78522(18) 0.0379(10) Uani 1 1 d . . .
O12 O 0.24347(19) 0.9741(3) 0.74263(18) 0.0408(11) Uani 1 1 d . . .
O13 O 0.1578(2) 0.9594(3) 0.86540(19) 0.0502(12) Uani 1 1 d . . .
O14 O 0.25136(17) 0.7329(3) 0.72411(17) 0.0374(10) Uani 1 1 d . . .
O15 O 0.13450(18) 0.7299(3) 0.72510(18) 0.0431(11) Uani 1 1 d . . .
O16 O 0.3611(2) 0.9777(3) 0.7436(2) 0.0480(12) Uani 1 1 d . . .
O17 O 0.26708(19) 0.9686(3) 0.84365(18) 0.0414(11) Uani 1 1 d . . .
O18 O 0.1738(2) 0.6035(3) 0.6693(2) 0.0531(13) Uani 1 1 d . . .
O19 O 0.4146(2) 0.8943(4) 0.6719(2) 0.0613(15) Uani 1 1 d . . .
O20 O 0.3824(2) 0.9820(4) 0.8567(2) 0.0559(14) Uani 1 1 d . . .
O21 O 0.4423(2) 0.8531(3) 0.7761(2) 0.0579(14) Uani 1 1 d . . .
O22 O 0.1841(2) 1.0883(3) 0.8047(2) 0.0569(14) Uani 1 1 d . . .
O23 O 0.3203(3) 1.1010(3) 0.7994(2) 0.0622(15) Uani 1 1 d . . .
O24 O 0.22627(19) 0.7366(3) 0.62393(17) 0.0426(11) Uani 1 1 d . . .
N1 N 0.4882(3) 0.6078(5) 0.6952(3) 0.0611(19) Uani 1 1 d . . .
N2 N 0.0176(3) 0.5723(6) 0.7541(3) 0.075(2) Uani 1 1 d . . .
N3 N 0.2014(3) 0.9701(4) 0.0182(2) 0.0541(16) Uani 1 1 d . J .
N4 N -0.0598(8) 0.9818(12) 0.5432(7) 0.108(5) Uiso 0.60 1 d P . .
N5 N 0.1448(18) 0.263(3) 0.7166(17) 0.116(12) Uiso 0.30 1 d P . .
N5' N 0.1280(17) 0.319(3) 0.7441(16) 0.114(12) Uiso 0.30 1 d P . .
C1 C 0.2294(3) 1.0218(5) 0.6942(3) 0.0486(18) Uani 1 1 d . A .
H1A H 0.2595 1.0614 0.6927 0.058 Uiso 1 1 calc R . .
H1B H 0.1952 1.0530 0.6959 0.058 Uiso 1 1 calc R . .
C2 C 0.2740(3) 0.9245(5) 0.6348(3) 0.0493(18) Uani 1 1 d . A .
H2A H 0.2669 0.8966 0.6005 0.059 Uiso 1 1 calc R . .
H2B H 0.3041 0.9644 0.6338 0.059 Uiso 1 1 calc R . .
C3 C 0.1687(3) 0.9125(5) 0.6400(3) 0.0496(18) Uani 1 1 d . A .
H3A H 0.1355 0.9456 0.6422 0.059 Uiso 1 1 calc R . .
H3B H 0.1625 0.8850 0.6056 0.059 Uiso 1 1 calc R . .
C4 C 0.2203(3) 0.9712(5) 0.6427(3) 0.0487(18) Uani 1 1 d . . .
C5 C 0.2044(4) 1.0316(6) 0.5946(4) 0.066(2) Uani 1 1 d . A 1
H5A H 0.1958 0.9983 0.5625 0.079 Uiso 1 1 calc R A 1
H5B H 0.1697 1.0596 0.5990 0.079 Uiso 1 1 calc R A 1
C6 C 0.2446(6) 1.0947(9) 0.5851(5) 0.116(5) Uani 1 1 d . A 1
H6A H 0.2808 1.0685 0.5840 0.139 Uiso 1 1 calc R A 1
H6B H 0.2498 1.1333 0.6148 0.139 Uiso 1 1 calc R A 1
C7 C 0.2252(6) 1.1467(10) 0.5296(5) 0.094(5) Uani 0.80 1 d P A 1
H7A H 0.2148 1.1086 0.5001 0.112 Uiso 0.80 1 calc PR A 1
H7B H 0.1926 1.1809 0.5324 0.112 Uiso 0.80 1 calc PR A 1
C8 C 0.2759(7) 1.2029(10) 0.5193(6) 0.096(4) Uiso 0.80 1 d P A 1
H8A H 0.2878 1.2392 0.5495 0.115 Uiso 0.80 1 calc PR A 1
H8B H 0.3078 1.1689 0.5139 0.115 Uiso 0.80 1 calc PR A 1
C9 C 0.2542(7) 1.2544(10) 0.4686(7) 0.088(4) Uiso 0.70 1 d P A 1
H9A H 0.2225 1.2875 0.4756 0.105 Uiso 0.70 1 calc PR A 1
H9B H 0.2397 1.2161 0.4401 0.105 Uiso 0.70 1 calc PR A 1
C8' C 0.305(3) 1.139(4) 0.465(3) 0.099(18) Uiso 0.20 1 d P B 2
C9' C 0.2936(14) 1.199(2) 0.4275(13) 0.068(8) Uiso 0.30 1 d P B 2
C10 C 0.2980(9) 1.3152(14) 0.4469(9) 0.127(7) Uiso 0.70 1 d P A 1
H10A H 0.2774 1.3497 0.4189 0.152 Uiso 0.70 1 calc PR A 1
H10B H 0.3149 1.3514 0.4757 0.152 Uiso 0.70 1 calc PR A 1
C11 C 0.3368(11) 1.2783(16) 0.4289(10) 0.143(8) Uiso 0.70 1 d P A 1
H11A H 0.3569 1.2459 0.4583 0.172 Uiso 0.70 1 calc PR A 1
H11B H 0.3629 1.3210 0.4214 0.172 Uiso 0.70 1 calc PR A 1
C12 C 0.3296(11) 1.2306(17) 0.3886(11) 0.098(7) Uiso 0.50 1 d P A 1
H12 H 0.3241 1.2572 0.3557 0.118 Uiso 0.50 1 calc PR A 1
C13 C 0.3285(13) 1.149(2) 0.3863(14) 0.132(10) Uiso 0.50 1 d P A 1
H13A H 0.3337 1.1177 0.4176 0.158 Uiso 0.50 1 calc PR A 1
H13B H 0.3227 1.1220 0.3534 0.158 Uiso 0.50 1 calc PR A 1
C14 C 0.2757(3) 0.7366(4) 0.8242(3) 0.0383(15) Uani 1 1 d . . .
C15 C 0.2218(3) 0.7836(4) 0.8323(3) 0.0400(15) Uani 1 1 d . . .
H15A H 0.1920 0.7436 0.8341 0.048 Uiso 1 1 calc R . .
H15B H 0.2294 0.8124 0.8662 0.048 Uiso 1 1 calc R . .
C16 C 0.2655(3) 0.6849(4) 0.7726(3) 0.0414(15) Uani 1 1 d . . .
H16A H 0.2993 0.6528 0.7707 0.050 Uiso 1 1 calc R . .
H16B H 0.2350 0.6461 0.7745 0.050 Uiso 1 1 calc R . .
C17 C 0.3264(3) 0.7937(4) 0.8268(3) 0.0413(16) Uani 1 1 d . . .
H17A H 0.3328 0.8213 0.8612 0.050 Uiso 1 1 calc R . .
H17B H 0.3596 0.7604 0.8246 0.050 Uiso 1 1 calc R . .
C18 C 0.2897(3) 0.6733(5) 0.8702(3) 0.0457(17) Uani 1 1 d . . .
H18A H 0.2585 0.6346 0.8677 0.055 Uiso 1 1 calc R . .
H18B H 0.3227 0.6420 0.8645 0.055 Uiso 1 1 calc R . .
C19 C 0.3012(4) 0.7073(5) 0.9269(3) 0.063(2) Uani 1 1 d . . .
H19A H 0.3355 0.7404 0.9313 0.075 Uiso 1 1 calc R . .
H19B H 0.2703 0.7437 0.9317 0.075 Uiso 1 1 calc R . .
C20 C 0.3078(4) 0.6413(5) 0.9701(3) 0.059(2) Uani 1 1 d . . .
H20A H 0.3083 0.6681 1.0043 0.071 Uiso 1 1 calc R . .
H20B H 0.2750 0.6051 0.9638 0.071 Uiso 1 1 calc R . .
C21 C 0.3598(4) 0.5897(6) 0.9731(3) 0.064(2) Uani 1 1 d . . .
H21A H 0.3920 0.6257 0.9721 0.077 Uiso 1 1 calc R . .
H21B H 0.3558 0.5537 0.9422 0.077 Uiso 1 1 calc R . .
C22 C 0.3714(4) 0.5364(6) 1.0242(4) 0.069(3) Uani 1 1 d . . .
H22A H 0.3739 0.5725 1.0550 0.083 Uiso 1 1 calc R . .
H22B H 0.3396 0.4994 1.0246 0.083 Uiso 1 1 calc R . .
C23 C 0.4254(5) 0.4851(7) 1.0294(4) 0.087(3) Uani 1 1 d . . .
H23A H 0.4222 0.4470 0.9995 0.105 Uiso 1 1 calc R . .
H23B H 0.4570 0.5218 1.0275 0.105 Uiso 1 1 calc R . .
C24 C 0.4374(5) 0.4363(7) 1.0808(4) 0.089(3) Uani 1 1 d . . .
H24A H 0.4089 0.3936 1.0802 0.106 Uiso 1 1 calc R . .
H24B H 0.4347 0.4730 1.1104 0.106 Uiso 1 1 calc R . .
C25 C 0.4959(6) 0.3960(9) 1.0897(5) 0.104(4) Uani 1 1 d . . .
H25 H 0.5267 0.4295 1.0865 0.125 Uiso 1 1 calc R . .
C26 C 0.5059(7) 0.3182(8) 1.1013(6) 0.128(5) Uani 1 1 d . . .
H26A H 0.4762 0.2827 1.1048 0.154 Uiso 1 1 calc R . .
H26B H 0.5428 0.2981 1.1061 0.154 Uiso 1 1 calc R . .
C27 C 0.4658(3) 0.6763(5) 0.6555(4) 0.061(2) Uani 1 1 d . . .
H27A H 0.4295 0.6587 0.6358 0.073 Uiso 1 1 calc R . .
H27B H 0.4591 0.7253 0.6756 0.073 Uiso 1 1 calc R . .
C28 C 0.5032(4) 0.6998(6) 0.6163(4) 0.068(2) Uani 1 1 d . . .
H28A H 0.5056 0.6540 0.5920 0.082 Uiso 1 1 calc R . .
H28B H 0.5410 0.7117 0.6350 0.082 Uiso 1 1 calc R . .
C29 C 0.4791(5) 0.7755(7) 0.5850(4) 0.081(3) Uani 1 1 d . . .
H29A H 0.4402 0.7647 0.5686 0.097 Uiso 1 1 calc R . .
H29B H 0.4792 0.8220 0.6092 0.097 Uiso 1 1 calc R . .
C30 C 0.5114(7) 0.7967(10) 0.5441(6) 0.134(5) Uiso 1 1 d . . .
H30A H 0.5499 0.8075 0.5602 0.202 Uiso 1 1 calc R . .
H30B H 0.4955 0.8453 0.5255 0.202 Uiso 1 1 calc R . .
H30C H 0.5103 0.7515 0.5194 0.202 Uiso 1 1 calc R . .
C31 C 0.4435(4) 0.5935(6) 0.7302(4) 0.069(2) Uiso 1 1 d . D .
H31A H 0.4078 0.5812 0.7073 0.083 Uiso 1 1 calc R . .
H31B H 0.4386 0.6445 0.7490 0.083 Uiso 1 1 calc R . .
C32 C 0.4569(5) 0.5234(8) 0.7713(5) 0.093(3) Uiso 1 1 d . . .
H32A H 0.4915 0.5358 0.7958 0.112 Uiso 1 1 calc R C 1
H32B H 0.4622 0.4718 0.7533 0.112 Uiso 1 1 calc R C 1
C33 C 0.4073(6) 0.5148(9) 0.8025(6) 0.119(5) Uiso 1 1 d D D 1
H33A H 0.4162 0.4728 0.8300 0.142 Uiso 1 1 calc R D 1
H33B H 0.4014 0.5669 0.8197 0.142 Uiso 1 1 calc R D 1
C34' C 0.4101(10) 0.4339(13) 0.8362(9) 0.094(7) Uiso 0.50 1 d PD E 2
C34 C 0.3568(13) 0.492(3) 0.7662(15) 0.153(16) Uiso 0.40 1 d PD . .
H34A H 0.3493 0.5322 0.7382 0.230 Uiso 0.40 1 calc PR D 1
H34B H 0.3255 0.4896 0.7851 0.230 Uiso 0.40 1 calc PR D 1
H34C H 0.3621 0.4384 0.7511 0.230 Uiso 0.40 1 calc PR D 1
C35 C 0.5460(4) 0.6337(7) 0.7273(4) 0.082(3) Uani 1 1 d . . .
H35A H 0.5590 0.5904 0.7529 0.099 Uiso 1 1 calc R . .
H35B H 0.5730 0.6375 0.7030 0.099 Uiso 1 1 calc R . .
C36 C 0.5465(5) 0.7144(8) 0.7568(5) 0.101(4) Uani 1 1 d . . .
H36A H 0.5281 0.7069 0.7876 0.122 Uiso 1 1 calc R . .
H36B H 0.5253 0.7554 0.7337 0.122 Uiso 1 1 calc R . .
C37 C 0.6065(6) 0.7456(9) 0.7751(6) 0.119(5) Uiso 1 1 d . . .
H37A H 0.6268 0.7478 0.7453 0.143 Uiso 1 1 calc R . .
H37B H 0.6058 0.8007 0.7902 0.143 Uiso 1 1 calc R . .
C38 C 0.6342(7) 0.6866(10) 0.8160(7) 0.143(6) Uiso 1 1 d . . .
H38A H 0.6153 0.6879 0.8464 0.214 Uiso 1 1 calc R . .
H38B H 0.6731 0.7021 0.8269 0.214 Uiso 1 1 calc R . .
H38C H 0.6322 0.6317 0.8014 0.214 Uiso 1 1 calc R . .
C39 C 0.4985(3) 0.5293(6) 0.6658(4) 0.066(2) Uani 1 1 d . . .
H39A H 0.5173 0.4897 0.6916 0.079 Uiso 1 1 calc R . .
H39B H 0.5242 0.5420 0.6413 0.079 Uiso 1 1 calc R . .
C40 C 0.4458(4) 0.4887(6) 0.6345(4) 0.071(2) Uani 1 1 d . . .
H40A H 0.4240 0.5290 0.6114 0.085 Uiso 1 1 calc R . .
H40B H 0.4223 0.4671 0.6589 0.085 Uiso 1 1 calc R . .
C41 C 0.4644(5) 0.4182(8) 0.6013(5) 0.095(3) Uiso 1 1 d . . .
H41A H 0.4884 0.4406 0.5776 0.114 Uiso 1 1 calc R . .
H41B H 0.4867 0.3788 0.6249 0.114 Uiso 1 1 calc R . .
C42 C 0.4148(7) 0.3730(10) 0.5681(7) 0.143(6) Uiso 1 1 d . . .
H42A H 0.3885 0.3564 0.5907 0.214 Uiso 1 1 calc R . .
H42B H 0.4283 0.3249 0.5520 0.214 Uiso 1 1 calc R . .
H42C H 0.3961 0.4093 0.5407 0.214 Uiso 1 1 calc R . .
C43 C 0.0051(4) 0.6482(7) 0.7201(4) 0.081(3) Uani 1 1 d . . .
H43A H 0.0308 0.6491 0.6945 0.097 Uiso 1 1 calc R . .
H43B H 0.0135 0.6964 0.7429 0.097 Uiso 1 1 calc R . .
C44 C -0.0555(4) 0.6575(8) 0.6892(5) 0.097(4) Uani 1 1 d . . .
H44A H -0.0655 0.6093 0.6669 0.117 Uiso 1 1 calc R . .
H44B H -0.0819 0.6613 0.7142 0.117 Uiso 1 1 calc R . .
C45 C -0.0598(5) 0.7331(9) 0.6556(6) 0.115(5) Uani 1 1 d . . .
H45A H -0.0332 0.7286 0.6310 0.138 Uiso 1 1 calc R . .
H45B H -0.0489 0.7807 0.6784 0.138 Uiso 1 1 calc R . .
C46 C -0.1194(7) 0.7481(10) 0.6236(6) 0.140(6) Uiso 1 1 d . . .
H46A H -0.1345 0.6970 0.6080 0.210 Uiso 1 1 calc R . .
H46B H -0.1173 0.7878 0.5958 0.210 Uiso 1 1 calc R . .
H46C H -0.1437 0.7690 0.6469 0.210 Uiso 1 1 calc R . .
C47 C 0.0781(4) 0.5817(7) 0.7826(4) 0.079(3) Uani 1 1 d . G .
H47A H 0.1027 0.5850 0.7561 0.095 Uiso 1 1 calc R . .
H47B H 0.0814 0.6337 0.8021 0.095 Uiso 1 1 calc R . .
C48 C 0.0989(5) 0.5124(8) 0.8212(4) 0.092(4) Uani 1 1 d . . .
H48A H 0.0910 0.4594 0.8035 0.110 Uiso 1 1 calc R F 1
H48B H 0.0790 0.5144 0.8513 0.110 Uiso 1 1 calc R F 1
C49 C 0.1624(4) 0.5211(8) 0.8407(4) 0.090(3) Uani 1 1 d D G 1
H49A H 0.1817 0.5106 0.8109 0.108 Uiso 1 1 calc R G 1
H49B H 0.1701 0.5780 0.8519 0.108 Uiso 1 1 calc R G 1
C50 C 0.1870(9) 0.4659(12) 0.8854(7) 0.104(6) Uiso 0.60 1 d PD G 1
H50A H 0.1630 0.4659 0.9121 0.156 Uiso 0.60 1 calc PR G 1
H50B H 0.2239 0.4856 0.9009 0.156 Uiso 0.60 1 calc PR G 1
H50C H 0.1899 0.4106 0.8723 0.156 Uiso 0.60 1 calc PR G 1
C50' C 0.1954(12) 0.4792(19) 0.8020(11) 0.096(9) Uiso 0.40 1 d PD H 2
C51 C 0.0096(4) 0.4948(6) 0.7207(4) 0.071(3) Uani 1 1 d . . .
H51A H -0.0297 0.4924 0.7035 0.086 Uiso 1 1 calc R . .
H51B H 0.0164 0.4476 0.7446 0.086 Uiso 1 1 calc R . .
C52 C 0.0463(4) 0.4848(9) 0.6779(5) 0.104(4) Uani 1 1 d . . .
H52A H 0.0386 0.5300 0.6525 0.124 Uiso 1 1 calc R . .
H52B H 0.0858 0.4878 0.6943 0.124 Uiso 1 1 calc R . .
C53 C 0.0356(4) 0.4036(8) 0.6485(5) 0.089(3) Uani 1 1 d . . .
H53A H 0.0365 0.3592 0.6744 0.107 Uiso 1 1 calc R . .
H53B H 0.0659 0.3937 0.6284 0.107 Uiso 1 1 calc R . .
C54 C -0.0215(4) 0.4008(8) 0.6100(4) 0.091(3) Uani 1 1 d . . .
H54A H -0.0519 0.4017 0.6302 0.137 Uiso 1 1 calc R . .
H54B H -0.0237 0.3509 0.5892 0.137 Uiso 1 1 calc R . .
H54C H -0.0245 0.4480 0.5867 0.137 Uiso 1 1 calc R . .
C55 C -0.0226(4) 0.5629(8) 0.7944(4) 0.087(4) Uani 1 1 d . . .
H55A H -0.0131 0.5123 0.8146 0.104 Uiso 1 1 calc R . .
H55B H -0.0609 0.5573 0.7752 0.104 Uiso 1 1 calc R . .
C56 C -0.0202(5) 0.6358(9) 0.8333(4) 0.107(5) Uani 1 1 d . . .
H56A H 0.0177 0.6414 0.8536 0.128 Uiso 1 1 calc R . .
H56B H -0.0299 0.6868 0.8137 0.128 Uiso 1 1 calc R . .
C57 C -0.0623(6) 0.6191(10) 0.8708(6) 0.128(6) Uani 1 1 d . . .
H57A H -0.0999 0.6139 0.8497 0.153 Uiso 1 1 calc R . .
H57B H -0.0529 0.5666 0.8886 0.153 Uiso 1 1 calc R . .
C58 C -0.0638(7) 0.6850(11) 0.9125(5) 0.153(8) Uani 1 1 d . . .
H58A H -0.0259 0.6990 0.9287 0.229 Uiso 1 1 calc R . .
H58B H -0.0841 0.6646 0.9393 0.229 Uiso 1 1 calc R . .
H58C H -0.0825 0.7334 0.8961 0.229 Uiso 1 1 calc R . .
C59 C 0.2508(3) 0.9700(5) -0.0120(3) 0.0542(19) Uani 1 1 d . . .
H59A H 0.2370 0.9501 -0.0478 0.065 Uiso 1 1 calc R . .
H59B H 0.2626 1.0270 -0.0151 0.065 Uiso 1 1 calc R . .
C60 C 0.3027(3) 0.9199(6) 0.0104(3) 0.059(2) Uani 1 1 d . . .
H60A H 0.3193 0.9408 0.0454 0.071 Uiso 1 1 calc R . .
H60B H 0.2924 0.8624 0.0142 0.071 Uiso 1 1 calc R . .
C61 C 0.3451(4) 0.9265(6) -0.0272(4) 0.067(2) Uani 1 1 d . . .
H61A H 0.3277 0.9068 -0.0622 0.081 Uiso 1 1 calc R . .
H61B H 0.3550 0.9843 -0.0306 0.081 Uiso 1 1 calc R . .
C62 C 0.3981(4) 0.8775(9) -0.0083(4) 0.101(4) Uani 1 1 d . . .
H62A H 0.4175 0.9003 0.0246 0.152 Uiso 1 1 calc R . .
H62B H 0.4223 0.8800 -0.0348 0.152 Uiso 1 1 calc R . .
H62C H 0.3883 0.8208 -0.0029 0.152 Uiso 1 1 calc R . .
C63 C 0.1788(4) 0.8830(5) 0.0226(3) 0.057(2) Uani 1 1 d . . .
H63A H 0.2072 0.8514 0.0459 0.068 Uiso 1 1 calc R . .
H63B H 0.1458 0.8865 0.0398 0.068 Uiso 1 1 calc R . .
C64 C 0.1625(4) 0.8349(6) -0.0287(3) 0.060(2) Uani 1 1 d . . .
H64A H 0.1954 0.8274 -0.0456 0.072 Uiso 1 1 calc R . .
H64B H 0.1344 0.8657 -0.0530 0.072 Uiso 1 1 calc R . .
C65 C 0.1387(5) 0.7515(7) -0.0173(4) 0.082(3) Uani 1 1 d . . .
H65A H 0.1654 0.7239 0.0101 0.098 Uiso 1 1 calc R . .
H65B H 0.1040 0.7599 -0.0031 0.098 Uiso 1 1 calc R . .
C66 C 0.1264(5) 0.6962(8) -0.0648(4) 0.094(4) Uani 1 1 d . . .
H66A H 0.1026 0.7248 -0.0933 0.141 Uiso 1 1 calc R . .
H66B H 0.1075 0.6472 -0.0557 0.141 Uiso 1 1 calc R . .
H66C H 0.1612 0.6810 -0.0761 0.141 Uiso 1 1 calc R . .
C67 C 0.1576(4) 1.0259(6) -0.0135(3) 0.066(2) Uani 1 1 d . J .
H67A H 0.1479 1.0029 -0.0491 0.079 Uiso 1 1 calc R . .
H67B H 0.1752 1.0793 -0.0169 0.079 Uiso 1 1 calc R . .
C68 C 0.1026(5) 1.0410(8) 0.0075(5) 0.101(4) Uiso 1 1 d . . .
H68A H 0.0819 0.9894 0.0081 0.121 Uiso 1 1 calc R I 1
H68B H 0.1107 1.0626 0.0436 0.121 Uiso 1 1 calc R I 1
C69 C 0.0674(6) 1.1031(10) -0.0290(6) 0.101(5) Uiso 0.80 1 d PD J 1
H69A H 0.0890 1.1542 -0.0270 0.122 Uiso 0.80 1 calc PR J 1
H69B H 0.0648 1.0825 -0.0652 0.122 Uiso 0.80 1 calc PR J 1
C70 C 0.0107(7) 1.1247(12) -0.0217(8) 0.089(5) Uiso 0.60 1 d PD J 1
H70A H -0.0157 1.0861 -0.0409 0.134 Uiso 0.60 1 calc PR J 1
H70B H 0.0019 1.1796 -0.0350 0.134 Uiso 0.60 1 calc PR J 1
H70C H 0.0084 1.1226 0.0156 0.134 Uiso 0.60 1 calc PR J 1
C70' C 0.0754(15) 1.1690(18) 0.0107(12) 0.107(10) Uiso 0.40 1 d PD K 2
C71 C 0.2190(4) 1.0001(6) 0.0750(3) 0.068(3) Uani 1 1 d . . .
H71A H 0.1866 0.9955 0.0930 0.081 Uiso 1 1 calc R L 1
H71B H 0.2479 0.9628 0.0929 0.081 Uiso 1 1 calc R L 1
C72 C 0.2413(5) 1.0870(7) 0.0824(4) 0.092(3) Uani 1 1 d D M 1
H72A H 0.2102 1.1262 0.0773 0.110 Uiso 1 1 calc R M 1
H72B H 0.2656 1.0990 0.0564 0.110 Uiso 1 1 calc R M 1
C73 C 0.2756(8) 1.0944(14) 0.1401(6) 0.100(6) Uiso 0.60 1 d PD M 1
H73A H 0.3100 1.0621 0.1416 0.120 Uiso 0.60 1 calc PR M 1
H73B H 0.2870 1.1518 0.1458 0.120 Uiso 0.60 1 calc PR M 1
C74 C 0.2484(10) 1.0685(15) 0.1854(8) 0.149(9) Uiso 0.70 1 d PD M 1
H74A H 0.2093 1.0558 0.1726 0.224 Uiso 0.70 1 calc PR M 1
H74B H 0.2509 1.1127 0.2109 0.224 Uiso 0.70 1 calc PR M 1
H74C H 0.2673 1.0204 0.2020 0.224 Uiso 0.70 1 calc PR M 1
C73' C 0.2373(10) 1.1258(12) 0.1376(6) 0.064(6) Uiso 0.40 1 d PD N 2
C74' C 0.2833(15) 1.072(2) 0.1789(14) 0.041(8) Uiso 0.20 1 d P N 2
C75 C -0.0188(7) 0.9383(10) 0.5513(7) 0.129(5) Uiso 1 1 d . . .
C76 C 0.0225(5) 0.8739(7) 0.5566(5) 0.090(3) Uiso 1 1 d . . .
H76A H 0.0051 0.8234 0.5421 0.135 Uiso 1 1 calc R . .
H76B H 0.0378 0.8661 0.5936 0.135 Uiso 1 1 calc R . .
H76C H 0.0523 0.8890 0.5376 0.135 Uiso 1 1 calc R . .
C77 C 0.2008(13) 0.2435(19) 0.7318(13) 0.114(9) Uiso 0.50 1 d P . .
C78 C 0.2357(8) 0.2507(11) 0.7657(7) 0.105(5) Uiso 0.80 1 d P . .
C77' C 0.1734(13) 0.2891(18) 0.7527(12) 0.104(8) Uiso 0.50 1 d P . .
C78' C 0.182(2) 0.241(3) 0.668(2) 0.081(14) Uiso 0.20 1 d P . .
 
loop_
 _atom_site_aniso_label
 _atom_site_aniso_U_11
 _atom_site_aniso_U_22
 _atom_site_aniso_U_33
 _atom_site_aniso_U_23
 _atom_site_aniso_U_13
 _atom_site_aniso_U_12
Mo1 0.0329(3) 0.0482(3) 0.0379(3) 0.0021(2) 0.0062(2) 0.0051(2)
Mo2 0.0277(3) 0.0618(4) 0.0354(3) -0.0051(3) 0.0036(2) -0.0058(2)
Mo3 0.0260(3) 0.0626(4) 0.0363(3) -0.0004(3) 0.0035(2) 0.0009(2)
Mo4 0.0271(3) 0.0484(3) 0.0389(3) 0.0002(2) 0.0053(2) 0.0003(2)
Mo5 0.0283(3) 0.0462(3) 0.0538(3) -0.0005(3) 0.0116(2) -0.0052(2)
Mo6 0.0361(3) 0.0428(3) 0.0510(3) -0.0011(3) 0.0114(2) -0.0073(2)
Mn1 0.0241(5) 0.0393(6) 0.0304(5) 0.0050(4) 0.0047(4) -0.0002(4)
O1 0.034(2) 0.043(3) 0.031(2) 0.0080(19) -0.0030(18) 0.0022(19)
O2 0.032(2) 0.044(3) 0.041(2) 0.008(2) 0.0046(19) 0.002(2)
O3 0.030(2) 0.048(3) 0.043(3) 0.002(2) 0.0073(19) 0.003(2)
O4 0.037(2) 0.059(3) 0.035(2) 0.011(2) 0.0064(19) 0.008(2)
O5 0.033(3) 0.098(4) 0.041(3) -0.006(3) 0.003(2) -0.002(3)
O6 0.039(3) 0.052(3) 0.057(3) -0.003(2) 0.000(2) 0.001(2)
O7 0.035(3) 0.087(4) 0.047(3) -0.005(3) 0.001(2) 0.002(3)
O8 0.042(3) 0.069(3) 0.049(3) 0.002(3) 0.017(2) 0.001(2)
O9 0.033(2) 0.057(3) 0.039(2) 0.001(2) 0.0033(19) 0.013(2)
O10 0.036(3) 0.068(3) 0.048(3) 0.005(2) 0.011(2) 0.001(2)
O11 0.032(2) 0.039(2) 0.043(3) 0.009(2) 0.0084(19) 0.0026(19)
O12 0.037(2) 0.044(3) 0.042(3) 0.014(2) 0.011(2) 0.006(2)
O13 0.041(3) 0.069(4) 0.041(3) 0.001(2) 0.008(2) -0.002(2)
O14 0.028(2) 0.051(3) 0.031(2) 0.004(2) -0.0001(18) -0.002(2)
O15 0.028(2) 0.063(3) 0.039(2) -0.003(2) 0.0055(19) -0.007(2)
O16 0.037(3) 0.050(3) 0.059(3) 0.002(2) 0.014(2) -0.010(2)
O17 0.038(2) 0.045(3) 0.043(3) -0.003(2) 0.011(2) -0.003(2)
O18 0.051(3) 0.063(3) 0.049(3) -0.012(3) 0.019(2) -0.014(3)
O19 0.058(3) 0.060(3) 0.073(4) -0.001(3) 0.033(3) -0.012(3)
O20 0.035(3) 0.077(4) 0.056(3) -0.007(3) 0.008(2) -0.013(3)
O21 0.034(3) 0.059(3) 0.077(4) -0.015(3) 0.002(3) -0.004(2)
O22 0.056(3) 0.052(3) 0.064(3) 0.002(3) 0.015(3) 0.009(3)
O23 0.077(4) 0.042(3) 0.075(4) -0.003(3) 0.032(3) -0.009(3)
O24 0.033(2) 0.061(3) 0.033(2) -0.001(2) 0.0039(19) -0.001(2)
N1 0.045(4) 0.079(5) 0.057(4) -0.001(4) 0.002(3) 0.029(3)
N2 0.049(4) 0.115(7) 0.060(4) 0.004(4) 0.007(3) -0.041(4)
N3 0.061(4) 0.066(4) 0.034(3) -0.004(3) 0.003(3) -0.006(3)
C1 0.048(4) 0.054(5) 0.046(4) 0.017(3) 0.013(3) 0.013(3)
C2 0.055(4) 0.054(5) 0.042(4) 0.019(3) 0.017(3) 0.013(4)
C3 0.045(4) 0.068(5) 0.036(4) 0.014(3) 0.007(3) 0.013(4)
C4 0.050(4) 0.056(5) 0.041(4) 0.019(3) 0.011(3) 0.012(4)
C5 0.067(6) 0.073(6) 0.063(5) 0.032(5) 0.025(4) 0.021(5)
C6 0.141(12) 0.112(11) 0.095(9) 0.017(8) 0.022(9) 0.034(9)
C7 0.093(10) 0.126(13) 0.066(8) 0.012(8) 0.028(7) 0.033(9)
C14 0.038(3) 0.040(4) 0.034(3) 0.007(3) -0.001(3) 0.002(3)
C15 0.041(4) 0.045(4) 0.034(3) 0.009(3) 0.007(3) 0.000(3)
C16 0.039(4) 0.040(4) 0.042(4) 0.006(3) -0.001(3) -0.001(3)
C17 0.039(4) 0.047(4) 0.035(3) 0.009(3) -0.002(3) 0.002(3)
C18 0.046(4) 0.049(4) 0.040(4) 0.006(3) 0.003(3) 0.000(3)
C19 0.085(6) 0.058(5) 0.042(4) 0.005(4) 0.001(4) 0.019(5)
C20 0.070(5) 0.068(5) 0.038(4) 0.006(4) 0.009(4) 0.011(4)
C21 0.078(6) 0.066(6) 0.050(5) 0.017(4) 0.018(4) 0.021(5)
C22 0.074(6) 0.077(6) 0.058(5) 0.029(5) 0.016(4) 0.022(5)
C23 0.108(9) 0.091(8) 0.065(6) 0.024(5) 0.020(6) 0.041(7)
C24 0.102(8) 0.089(8) 0.076(7) 0.026(6) 0.020(6) 0.045(7)
C25 0.108(9) 0.116(10) 0.091(8) 0.026(7) 0.022(7) 0.041(8)
C26 0.159(14) 0.094(10) 0.126(11) 0.011(8) 0.008(10) 0.062(10)
C27 0.048(5) 0.066(5) 0.069(5) -0.001(4) 0.014(4) 0.023(4)
C28 0.050(5) 0.078(6) 0.079(6) -0.002(5) 0.020(4) 0.001(4)
C29 0.084(7) 0.091(8) 0.075(6) -0.008(6) 0.034(6) -0.014(6)
C35 0.057(5) 0.094(8) 0.088(7) -0.020(6) -0.009(5) 0.030(5)
C36 0.081(8) 0.105(9) 0.110(9) -0.042(7) -0.006(7) 0.028(7)
C39 0.048(5) 0.079(6) 0.065(5) -0.005(5) -0.006(4) 0.029(4)
C40 0.060(5) 0.073(6) 0.077(6) 0.007(5) 0.005(5) 0.011(5)
C43 0.051(5) 0.115(9) 0.073(6) 0.004(6) 0.002(5) -0.029(5)
C44 0.053(6) 0.135(11) 0.097(8) 0.001(8) -0.008(5) -0.038(6)
C45 0.064(7) 0.130(12) 0.135(12) -0.003(9) -0.029(7) -0.013(7)
C47 0.053(5) 0.118(9) 0.062(5) 0.010(5) -0.002(4) -0.045(5)
C48 0.084(7) 0.115(9) 0.071(6) 0.023(6) 0.000(5) -0.048(7)
C49 0.077(7) 0.107(9) 0.082(7) 0.017(6) 0.002(6) -0.027(6)
C51 0.054(5) 0.098(7) 0.063(5) 0.005(5) 0.009(4) -0.036(5)
C52 0.063(6) 0.173(13) 0.081(7) -0.017(8) 0.031(6) -0.051(7)
C53 0.057(6) 0.128(10) 0.090(8) -0.013(7) 0.030(5) 0.000(6)
C54 0.076(7) 0.119(10) 0.079(7) 0.006(7) 0.016(6) -0.005(7)
C55 0.069(6) 0.132(10) 0.064(6) -0.013(6) 0.022(5) -0.061(6)
C56 0.100(8) 0.161(12) 0.061(6) -0.026(7) 0.022(6) -0.078(9)
C57 0.101(9) 0.175(15) 0.118(10) -0.058(10) 0.050(8) -0.074(10)
C58 0.171(15) 0.207(18) 0.095(10) -0.060(11) 0.064(10) -0.103(14)
C59 0.058(5) 0.065(5) 0.039(4) 0.001(4) 0.007(3) -0.009(4)
C60 0.054(5) 0.075(6) 0.042(4) -0.002(4) -0.006(4) 0.002(4)
C61 0.052(5) 0.088(7) 0.059(5) -0.012(5) 0.000(4) -0.001(5)
C62 0.070(7) 0.161(12) 0.068(6) -0.027(7) -0.001(5) 0.026(7)
C63 0.063(5) 0.071(6) 0.036(4) 0.003(4) 0.008(4) -0.011(4)
C64 0.063(5) 0.075(6) 0.043(4) -0.005(4) 0.014(4) -0.011(4)
C65 0.097(8) 0.101(8) 0.051(5) -0.014(5) 0.022(5) -0.048(6)
C66 0.114(9) 0.106(9) 0.066(6) 0.002(6) 0.027(6) -0.029(7)
C67 0.062(5) 0.079(6) 0.054(5) -0.010(4) 0.007(4) 0.006(5)
C71 0.077(6) 0.088(7) 0.039(4) -0.010(4) 0.009(4) -0.020(5)
C72 0.112(9) 0.098(8) 0.059(6) -0.017(6) -0.002(6) -0.024(7)
 
_geom_special_details
;
 All s.u.'s (except the s.u. in the dihedral angle between two l.s. planes)
 are estimated using the full covariance matrix.  The cell s.u.'s are taken
 into account individually in the estimation of s.u.'s in distances, angles
 and torsion angles; correlations between s.u.'s in cell parameters are only
 used when they are defined by crystal symmetry.  An approximate (isotropic)
 treatment of cell s.u.'s is used for estimating s.u.'s involving l.s. planes.
;
 
loop_
 _geom_bond_atom_site_label_1
 _geom_bond_atom_site_label_2
 _geom_bond_distance
 _geom_bond_site_symmetry_2
 _geom_bond_publ_flag
Mo1 O22 1.696(5) . ?
Mo1 O13 1.713(5) . ?
Mo1 O9 1.920(5) . ?
Mo1 O17 1.922(5) . ?
Mo1 O12 2.364(4) . ?
Mo1 O1 2.367(5) . ?
Mo2 O5 1.690(5) . ?
Mo2 O18 1.714(6) . ?
Mo2 O24 1.917(5) . ?
Mo2 O15 1.920(5) . ?
Mo2 O4 2.340(5) . ?
Mo2 O14 2.384(4) . ?
Mo3 O8 1.697(5) . ?
Mo3 O7 1.699(5) . ?
Mo3 O9 1.922(5) . ?
Mo3 O15 1.924(5) . ?
Mo3 O4 2.364(4) . ?
Mo3 O1 2.364(4) . ?
Mo4 O10 1.693(5) . ?
Mo4 O6 1.706(5) . ?
Mo4 O3 1.925(5) . ?
Mo4 O24 1.928(4) . ?
Mo4 O2 2.336(5) . ?
Mo4 O14 2.372(4) . ?
Mo5 O19 1.696(5) . ?
Mo5 O21 1.701(5) . ?
Mo5 O16 1.921(5) . ?
Mo5 O3 1.924(5) . ?
Mo5 O11 2.353(4) . ?
Mo5 O2 2.381(4) . ?
Mo6 O23 1.692(5) . ?
Mo6 O20 1.698(5) . ?
Mo6 O17 1.921(4) . ?
Mo6 O16 1.925(5) . ?
Mo6 O11 2.333(5) . ?
Mo6 O12 2.382(5) . ?
Mn1 O12 1.964(5) . ?
Mn1 O14 1.966(5) . ?
Mn1 O1 1.975(5) . ?
Mn1 O2 1.979(5) . ?
Mn1 O4 2.009(5) . ?
Mn1 O11 2.011(4) . ?
O1 C15 1.449(7) . ?
O2 C2 1.440(8) . ?
O4 C3 1.433(8) . ?
O11 C17 1.450(8) . ?
O12 C1 1.443(8) . ?
O14 C16 1.447(8) . ?
N1 C39 1.512(11) . ?
N1 C31 1.523(11) . ?
N1 C27 1.530(11) . ?
N1 C35 1.542(11) . ?
N2 C43 1.500(13) . ?
N2 C51 1.504(13) . ?
N2 C47 1.516(10) . ?
N2 C55 1.528(11) . ?
N3 C67 1.507(11) . ?
N3 C71 1.514(9) . ?
N3 C59 1.517(10) . ?
N3 C63 1.518(10) . ?
N4 C75 1.20(2) . ?
N5 C77' 1.13(4) . ?
N5 N5' 1.25(5) . ?
N5 C77 1.37(5) . ?
N5 C78' 1.68(7) . ?
N5' C77' 1.18(4) . ?
C1 C4 1.528(11) . ?
C2 C4 1.535(10) . ?
C3 C4 1.550(11) . ?
C4 C5 1.560(10) . ?
C5 C6 1.450(16) . ?
C6 C7 1.638(17) . ?
C7 C8 1.57(2) . ?
C8 C9 1.55(2) . ?
C9 C10 1.60(2) . ?
C8' C9' 1.35(7) . ?
C10 C11 1.25(3) . ?
C11 C12 1.27(3) . ?
C12 C13 1.32(4) . ?
C14 C17 1.518(9) . ?
C14 C16 1.540(9) . ?
C14 C15 1.541(9) . ?
C14 C18 1.546(9) . ?
C18 C19 1.522(10) . ?
C19 C20 1.520(11) . ?
C20 C21 1.491(11) . ?
C21 C22 1.543(11) . ?
C22 C23 1.523(13) . ?
C23 C24 1.510(13) . ?
C24 C25 1.528(15) . ?
C25 C26 1.303(17) . ?
C27 C28 1.501(12) . ?
C28 C29 1.519(14) . ?
C29 C30 1.439(16) . ?
C31 C32 1.538(14) . ?
C32 C33 1.543(17) . ?
C33 C34 1.441(19) . ?
C35 C36 1.502(14) . ?
C36 C37 1.519(17) . ?
C37 C38 1.481(19) . ?
C39 C40 1.522(12) . ?
C40 C41 1.529(14) . ?
C41 C42 1.522(18) . ?
C43 C44 1.537(13) . ?
C44 C45 1.482(17) . ?
C45 C46 1.540(18) . ?
C47 C48 1.515(14) . ?
C48 C49 1.525(14) . ?
C49 C50 1.484(15) . ?
C51 C52 1.521(13) . ?
C52 C53 1.508(16) . ?
C53 C54 1.542(14) . ?
C55 C56 1.532(15) . ?
C56 C57 1.527(15) . ?
C57 C58 1.507(17) . ?
C59 C60 1.512(11) . ?
C60 C61 1.512(12) . ?
C61 C62 1.505(13) . ?
C63 C64 1.510(11) . ?
C64 C65 1.510(12) . ?
C65 C66 1.491(13) . ?
C67 C68 1.526(14) . ?
C68 C69 1.520(18) . ?
C69 C70 1.445(15) . ?
C71 C72 1.501(14) . ?
C72 C73 1.560(15) . ?
C73 C74 1.477(17) . ?
C73' C74' 1.63(4) . ?
C75 C76 1.425(18) . ?
C77 C78 1.10(3) . ?
C77 C77' 1.17(4) . ?
C77 C78' 1.61(6) . ?
C78 C77' 1.60(3) . ?
 
loop_
 _geom_angle_atom_site_label_1
 _geom_angle_atom_site_label_2
 _geom_angle_atom_site_label_3
 _geom_angle
 _geom_angle_site_symmetry_1
 _geom_angle_site_symmetry_3
 _geom_angle_publ_flag
O22 Mo1 O13 106.3(3) . . ?
O22 Mo1 O9 98.6(2) . . ?
O13 Mo1 O9 101.0(2) . . ?
O22 Mo1 O17 102.6(2) . . ?
O13 Mo1 O17 99.3(2) . . ?
O9 Mo1 O17 145.11(19) . . ?
O22 Mo1 O12 91.5(2) . . ?
O13 Mo1 O12 161.6(2) . . ?
O9 Mo1 O12 80.43(18) . . ?
O17 Mo1 O12 71.70(17) . . ?
O22 Mo1 O1 160.0(2) . . ?
O13 Mo1 O1 92.8(2) . . ?
O9 Mo1 O1 71.29(17) . . ?
O17 Mo1 O1 79.60(17) . . ?
O12 Mo1 O1 70.08(16) . . ?
O5 Mo2 O18 105.4(3) . . ?
O5 Mo2 O24 99.4(2) . . ?
O18 Mo2 O24 102.4(2) . . ?
O5 Mo2 O15 102.3(2) . . ?
O18 Mo2 O15 97.8(2) . . ?
O24 Mo2 O15 145.1(2) . . ?
O5 Mo2 O4 92.7(2) . . ?
O18 Mo2 O4 160.9(2) . . ?
O24 Mo2 O4 80.37(19) . . ?
O15 Mo2 O4 71.65(19) . . ?
O5 Mo2 O14 161.8(2) . . ?
O18 Mo2 O14 91.8(2) . . ?
O24 Mo2 O14 70.67(17) . . ?
O15 Mo2 O14 80.63(17) . . ?
O4 Mo2 O14 71.00(16) . . ?
O8 Mo3 O7 105.9(3) . . ?
O8 Mo3 O9 102.9(2) . . ?
O7 Mo3 O9 97.7(2) . . ?
O8 Mo3 O15 97.7(2) . . ?
O7 Mo3 O15 102.8(2) . . ?
O9 Mo3 O15 145.61(18) . . ?
O8 Mo3 O4 161.3(2) . . ?
O7 Mo3 O4 91.4(2) . . ?
O9 Mo3 O4 81.24(18) . . ?
O15 Mo3 O4 71.06(18) . . ?
O8 Mo3 O1 92.5(2) . . ?
O7 Mo3 O1 160.5(2) . . ?
O9 Mo3 O1 71.33(17) . . ?
O15 Mo3 O1 80.59(17) . . ?
O4 Mo3 O1 71.34(16) . . ?
O10 Mo4 O6 104.9(3) . . ?
O10 Mo4 O3 102.7(2) . . ?
O6 Mo4 O3 98.2(2) . . ?
O10 Mo4 O24 98.9(2) . . ?
O6 Mo4 O24 101.7(2) . . ?
O3 Mo4 O24 145.52(19) . . ?
O10 Mo4 O2 92.0(2) . . ?
O6 Mo4 O2 162.0(2) . . ?
O3 Mo4 O2 71.39(17) . . ?
O24 Mo4 O2 81.43(19) . . ?
O10 Mo4 O14 160.8(2) . . ?
O6 Mo4 O14 93.3(2) . . ?
O3 Mo4 O14 80.33(16) . . ?
O24 Mo4 O14 70.77(16) . . ?
O2 Mo4 O14 70.79(16) . . ?
O19 Mo5 O21 105.4(3) . . ?
O19 Mo5 O16 98.9(2) . . ?
O21 Mo5 O16 102.2(2) . . ?
O19 Mo5 O3 102.1(2) . . ?
O21 Mo5 O3 98.5(2) . . ?
O16 Mo5 O3 145.26(19) . . ?
O19 Mo5 O11 161.0(2) . . ?
O21 Mo5 O11 92.6(2) . . ?
O16 Mo5 O11 70.80(17) . . ?
O3 Mo5 O11 80.75(17) . . ?
O19 Mo5 O2 92.0(2) . . ?
O21 Mo5 O2 161.2(2) . . ?
O16 Mo5 O2 81.60(19) . . ?
O3 Mo5 O2 70.38(17) . . ?
O11 Mo5 O2 71.12(15) . . ?
O23 Mo6 O20 105.6(3) . . ?
O23 Mo6 O17 102.4(2) . . ?
O20 Mo6 O17 98.1(2) . . ?
O23 Mo6 O16 97.4(2) . . ?
O20 Mo6 O16 102.8(2) . . ?
O17 Mo6 O16 146.1(2) . . ?
O23 Mo6 O11 160.4(2) . . ?
O20 Mo6 O11 92.7(2) . . ?
O17 Mo6 O11 81.49(18) . . ?
O16 Mo6 O11 71.19(18) . . ?
O23 Mo6 O12 91.6(2) . . ?
O20 Mo6 O12 161.6(2) . . ?
O17 Mo6 O12 71.29(17) . . ?
O16 Mo6 O12 80.93(18) . . ?
O11 Mo6 O12 71.21(16) . . ?
O12 Mn1 O14 179.82(19) . . ?
O12 Mn1 O1 87.21(19) . . ?
O14 Mn1 O1 92.65(19) . . ?
O12 Mn1 O2 92.68(19) . . ?
O14 Mn1 O2 87.46(19) . . ?
O1 Mn1 O2 179.9(2) . . ?
O12 Mn1 O4 92.8(2) . . ?
O14 Mn1 O4 87.27(19) . . ?
O1 Mn1 O4 87.56(18) . . ?
O2 Mn1 O4 92.45(18) . . ?
O12 Mn1 O11 87.36(19) . . ?
O14 Mn1 O11 92.53(18) . . ?
O1 Mn1 O11 92.75(18) . . ?
O2 Mn1 O11 87.24(18) . . ?
O4 Mn1 O11 179.6(2) . . ?
C15 O1 Mn1 116.2(4) . . ?
C15 O1 Mo3 122.6(4) . . ?
Mn1 O1 Mo3 101.06(17) . . ?
C15 O1 Mo1 120.7(4) . . ?
Mn1 O1 Mo1 101.15(18) . . ?
Mo3 O1 Mo1 90.23(15) . . ?
C2 O2 Mn1 116.5(4) . . ?
C2 O2 Mo4 121.0(4) . . ?
Mn1 O2 Mo4 101.31(19) . . ?
C2 O2 Mo5 121.4(4) . . ?
Mn1 O2 Mo5 100.82(18) . . ?
Mo4 O2 Mo5 90.95(15) . . ?
Mo5 O3 Mo4 121.8(2) . . ?
C3 O4 Mn1 115.3(4) . . ?
C3 O4 Mo2 122.6(4) . . ?
Mn1 O4 Mo2 100.94(19) . . ?
C3 O4 Mo3 122.1(4) . . ?
Mn1 O4 Mo3 100.04(18) . . ?
Mo2 O4 Mo3 90.80(17) . . ?
Mo1 O9 Mo3 121.5(2) . . ?
C17 O11 Mn1 115.3(4) . . ?
C17 O11 Mo6 121.2(4) . . ?
Mn1 O11 Mo6 100.83(18) . . ?
C17 O11 Mo5 122.4(4) . . ?
Mn1 O11 Mo5 100.82(18) . . ?
Mo6 O11 Mo5 91.59(15) . . ?
C1 O12 Mn1 115.7(4) . . ?
C1 O12 Mo1 121.3(4) . . ?
Mn1 O12 Mo1 101.57(18) . . ?
C1 O12 Mo6 122.8(4) . . ?
Mn1 O12 Mo6 100.58(18) . . ?
Mo1 O12 Mo6 89.77(16) . . ?
C16 O14 Mn1 116.0(4) . . ?
C16 O14 Mo4 122.2(4) . . ?
Mn1 O14 Mo4 100.44(18) . . ?
C16 O14 Mo2 121.7(4) . . ?
Mn1 O14 Mo2 100.78(18) . . ?
Mo4 O14 Mo2 90.55(14) . . ?
Mo2 O15 Mo3 121.2(3) . . ?
Mo5 O16 Mo6 121.7(3) . . ?
Mo6 O17 Mo1 121.3(2) . . ?
Mo2 O24 Mo4 123.0(2) . . ?
C39 N1 C31 110.6(7) . . ?
C39 N1 C27 110.4(6) . . ?
C31 N1 C27 106.9(6) . . ?
C39 N1 C35 106.3(6) . . ?
C31 N1 C35 113.0(7) . . ?
C27 N1 C35 109.7(8) . . ?
C43 N2 C51 111.2(7) . . ?
C43 N2 C47 105.9(7) . . ?
C51 N2 C47 111.9(8) . . ?
C43 N2 C55 112.4(9) . . ?
C51 N2 C55 105.2(7) . . ?
C47 N2 C55 110.5(7) . . ?
C67 N3 C71 112.0(7) . . ?
C67 N3 C59 105.3(6) . . ?
C71 N3 C59 111.6(6) . . ?
C67 N3 C63 111.5(7) . . ?
C71 N3 C63 105.7(6) . . ?
C59 N3 C63 110.8(6) . . ?
C77' N5 N5' 59(3) . . ?
C77' N5 C77 55(3) . . ?
N5' N5 C77 114(4) . . ?
C77' N5 C78' 111(4) . . ?
N5' N5 C78' 146(4) . . ?
C77 N5 C78' 63(3) . . ?
C77' N5' N5 55(3) . . ?
O12 C1 C4 115.1(6) . . ?
O2 C2 C4 114.0(5) . . ?
O4 C3 C4 114.7(6) . . ?
C1 C4 C2 112.0(6) . . ?
C1 C4 C3 111.1(6) . . ?
C2 C4 C3 112.0(7) . . ?
C1 C4 C5 108.5(7) . . ?
C2 C4 C5 107.6(6) . . ?
C3 C4 C5 105.2(6) . . ?
C6 C5 C4 119.3(9) . . ?
C5 C6 C7 113.9(12) . . ?
C8 C7 C6 109.0(12) . . ?
C9 C8 C7 106.8(12) . . ?
C8 C9 C10 118.0(15) . . ?
C11 C10 C9 114(2) . . ?
C10 C11 C12 125(3) . . ?
C11 C12 C13 130(3) . . ?
C17 C14 C16 112.0(6) . . ?
C17 C14 C15 112.2(6) . . ?
C16 C14 C15 111.4(5) . . ?
C17 C14 C18 107.4(5) . . ?
C16 C14 C18 105.6(6) . . ?
C15 C14 C18 107.7(5) . . ?
O1 C15 C14 114.2(5) . . ?
O14 C16 C14 114.6(6) . . ?
O11 C17 C14 114.6(5) . . ?
C19 C18 C14 117.3(6) . . ?
C20 C19 C18 114.3(7) . . ?
C21 C20 C19 114.3(7) . . ?
C20 C21 C22 112.6(7) . . ?
C23 C22 C21 113.9(8) . . ?
C24 C23 C22 113.1(8) . . ?
C23 C24 C25 112.7(9) . . ?
C26 C25 C24 125.0(15) . . ?
C28 C27 N1 115.9(7) . . ?
C27 C28 C29 109.6(7) . . ?
C30 C29 C28 111.5(10) . . ?
N1 C31 C32 115.1(8) . . ?
C31 C32 C33 109.1(10) . . ?
C34 C33 C32 109(2) . . ?
C36 C35 N1 115.4(8) . . ?
C35 C36 C37 111.5(10) . . ?
C38 C37 C36 106.9(13) . . ?
N1 C39 C40 115.4(7) . . ?
C39 C40 C41 108.4(8) . . ?
C42 C41 C40 112.9(11) . . ?
N2 C43 C44 116.9(8) . . ?
C45 C44 C43 109.9(9) . . ?
C44 C45 C46 113.7(11) . . ?
C48 C47 N2 114.7(8) . . ?
C47 C48 C49 110.1(8) . . ?
C50 C49 C48 116.0(12) . . ?
N2 C51 C52 117.3(8) . . ?
C53 C52 C51 112.1(9) . . ?
C52 C53 C54 113.4(10) . . ?
N2 C55 C56 113.5(8) . . ?
C57 C56 C55 108.2(9) . . ?
C58 C57 C56 114.4(11) . . ?
C60 C59 N3 118.3(6) . . ?
C61 C60 C59 108.9(7) . . ?
C62 C61 C60 112.6(8) . . ?
C64 C63 N3 117.1(6) . . ?
C63 C64 C65 110.1(7) . . ?
C66 C65 C64 114.0(8) . . ?
N3 C67 C68 118.3(8) . . ?
C69 C68 C67 108.3(10) . . ?
C70 C69 C68 121.1(14) . . ?
C72 C71 N3 117.0(7) . . ?
C71 C72 C73 108.0(11) . . ?
C74 C73 C72 118.7(16) . . ?
N4 C75 C76 168.7(19) . . ?
C78 C77 C77' 89(3) . . ?
C78 C77 N5 141(4) . . ?
C77' C77 N5 52(2) . . ?
C78 C77 C78' 147(4) . . ?
C77' C77 C78' 113(3) . . ?
N5 C77 C78' 68(3) . . ?
C77 C78 C77' 47.2(19) . . ?
N5 C77' C77 73(3) . . ?
N5 C77' N5' 66(3) . . ?
C77 C77' N5' 138(4) . . ?
N5 C77' C78 116(3) . . ?
C77 C77' C78 43.6(19) . . ?
N5' C77' C78 178(4) . . ?
C77 C78' N5 49(2) . . ?
 
_diffrn_measured_fraction_theta_max    0.986
_diffrn_reflns_theta_full              67.59
_diffrn_measured_fraction_theta_full   0.986
_refine_diff_density_max    1.10
_refine_diff_density_min   -0.97 
_refine_diff_density_rms    0.11
